# Supplementary material for: A review of coral bleaching specimen collection, preservation, and laboratory processing methods
Source: PeerJ. 2021 Jul 8;9:e11763. doi: 10.7717/peerj.11763 (PMC8272927; doi:10.7717/peerj.11763)
Supplement: Supplemental Information 8 [file peerj-09-11763-s008.xlsx]

## Sheet: data
Manuscript metadata					Sampling design																								Specimen collection														Specimen preservation		Specimen processing
Manuscript ID#	Authors	Title	Journal	Year of publication	Experiment or Survey?	Species 1	Species 2	Species 3	Species 4	Species 5	Species 6	Species 7	Species 8	Species 9	Species 10	Species 11	Species 12	Species 13	Species 14	Species 15	Species 16	Species 17	Species 18	Number of species sampled per study	Number parent colonies sampled per species	Number of specimens sampled per parent colony	Number of times sampled	Total number of specimens taken from the reef per study	Type of specimen removed from the reef	Sterile techniques	Collection tools used	Parent height (cm)	Parent diameter (cm)	Fragment height (cm)	Fragment surface area (cm2)	Fragment diameter (cm)	SURVEY: Duration between collection and preservation (mins)	SURVEY: Method of storage between collection and preservation	EXPERIMENT: duration of transport from reef to experimental location time (mins)	EXPERIMENT: method of transporting fragments from reef to experimental tanks	Tools used to collect specimens from experimental tanks	Post-experiment sterile techniques	Type of specimen sacrificed	Method of sacrifice	Processing pathway	Short-term preservative/fixatives used	Airbrushing methods	Homogenization methods	Homogenization duration (seconds)
1	Baumann J, Grottoli A, Hughes AD, Matsui Y	Photoautotrophic and heterotrophic carbon in bleached and non-bleached coral lipid acquisition and storage	JOURNAL OF MARINE BIOLOGY & ECOLOGY	2014	EXPERIMENT	Montipora capitata	Porites compressa	NA	NA	NA	NA	NA	NA	NA	NA	NA	NA	NA	NA	NA	NA	NA	NA	2	5	16	1	160	Fragment	DNS	DNS	DNS	DNS	5	DNS	DNS	NA	NA	DNS	DNS	NA	NA	Fragment	FROZ_50	FROZ_50, GR_tip,	NA	NA	MORTAR AND PESTLE	NA
2	BayL, Palumbi S	Multilocus adaptation associated with heat stress resistance in reef building corals	CURRENT BIOLOGY	2014	SURVEY	Acropora hyacinthus	NA	NA	NA	NA	NA	NA	NA	NA	NA	NA	NA	NA	NA	NA	NA	NA	NA	1	23	1	1	23	Fragment	DNS	DNS	DNS	DNS	DNS	DNS	DNS	DNS	DNS	NA	NA	NA	NA	Fragment	PRESERVED_RNAstabilizing sol	PRESERVED_RNAstabilizing sol, 4DEGC, FROZ_20, TRANS, FROZ_80	RNALATER	NA	NA	NA
3	Cantin N, Lough J	Surviving coral bleaching events: Porites growth anomalies on the Great Barrier Reef	PLOS ONE	2014	SURVEY	Porites sp.	NA	NA	NA	NA	NA	NA	NA	NA	NA	NA	NA	NA	NA	NA	NA	NA	NA	1	90	2	1	186	Skeletal core	DNS	DNS	150	DNS	NA	NA	50	DNS	DNS	NA	NA	NA	NA	Skeletal core	DNS_CORES CUT	CUT/SLICED, AIR DRIED	NA	NA	NA	NA
4	Fujise L, Yamashita H, Suzuki G, Sasaki K, Liao LM, Koike K	Moderate Thermal Stress Causes Active and Immediate Expulsion of Photosynthetically Damaged Zooxanthellae (Symbiodinium) from Corals	PLOS ONE	2014	EXPERIMENT	Acropora muricata	Acropora selago	NA	NA	NA	NA	NA	NA	NA	NA	NA	NA	NA	NA	NA	NA	NA	NA	2	DNS	DNS	1	36	Fragment	DNS	DNS	DNS	DNS	7.5	DNS	13	NA	NA	DNS	DNS	NA	DNS	Fragment	FROZ_unknown	FROZ_DNS, THAWED, AB_SWAB_SW	NA	AB_SW	NA	NA
5	Fujise L, Yamashita H, Suzuki G, Sasaki K, Liao LM, Koike K	Moderate Thermal Stress Causes Active and Immediate Expulsion of Photosynthetically Damaged Zooxanthellae (Symbiodinium) from Corals		2014	EXPERIMENT	Acropora muricata	Acropora selago	NA	NA	NA	NA	NA	NA	NA	NA	NA	NA	NA	NA	NA	NA	NA	NA	2	DNS	DNS	1	36	Fragment	DNS	DNS	DNS	DNS	7.5	DNS	13	NA	NA	DNS	DNS	Sieve	NA	Symbiodiniaceae cells	FIXED_SOLUTION (GLUT_2.5% & SUCROSE)	FIXED, 4DEGC, EMBEDDED, POST-FIXATION, DEHYDRATED, RESIN EMBEDDING	NA	NA	NA	NA
6.1	Garren M, Son K, Raina J, Rusconi R, Menolascina F, Shapiro OH, Tout J, Bourne DG, Seymour JR, Stocker R	A bacterial pathogen uses dimethylsulfoniopropionate as a cue to target heat-stressed corals	ISME JOURNAL	2014	EXPERIMENT	Pocillopora damicornis	Acropora millepora	NA	NA	NA	NA	NA	NA	NA	NA	NA	NA	NA	NA	NA	NA	NA	NA	1	3	16	1	48	Fragment	DNS	DNS	DNS	DNS	DNS	DNS	DNS	NA	NA	DNS	DNS	HELD OUT OF WATER, MUCUS COLLECTED IN SYRINGE/tube	DNS	Mucus	SNAP	SNAP, HOMOG > frozen or direct extraction	VAR	NA	NA	NA
6.2	Garren M, Son K, Raina J, Rusconi R, Menolascina F, Shapiro OH, Tout J, Bourne DG, Seymour JR, Stocker R	A bacterial pathogen uses dimethylsulfoniopropionate as a cue to target heat-stressed corals		2014	REPEAT	REPEAT	REPEAT	REPEAT	REPEAT	REPEAT	REPEAT	REPEAT	REPEAT	REPEAT	REPEAT	REPEAT	REPEAT	REPEAT	REPEAT	REPEAT	REPEAT	REPEAT	REPEAT	REPEAT	REPEAT	REPEAT	REPEAT	REPEAT	REPEAT	REPEAT	REPEAT	REPEAT	REPEAT	REPEAT	REPEAT	REPEAT	REPEAT	REPEAT	REPEAT	REPEAT	HELD OUT OF WATER, MUCUS COLLECTED IN SYRINGE	DNS	Mucus	PRESERVED_METHANOL	NONE, EXTRACTED_METHANOL	Var	NA	NA	NA
7	Grottoli AG, Warner ME, Levas SJ, Aschaffenburg MD, Schoefp V, McGinley M, Baumann J, Matsui Y	The cumulative impact of annual coral bleaching can turn some coral species winners into losers	Goniopora lobataAL CHANGE BIOLOGY	2014	EXPERIMENT	Porites astreoides	Orbicella faveolata	Porites divaricata	NA	NA	NA	NA	NA	NA	NA	NA	NA	NA	NA	NA	NA	NA	NA	3	9	10	1	270	Fragment	DNS	DNS	DNS	DNS	DNS	DNS	DNS	NA	NA	DNS	DNS	NA	NA	Fragment	FROZ_80	FROZ_80, DNS	NA	NA	NA	NA
8	Hawkins TD, Krueger T, Becker S, Fisher PL, Davy SK	Differential nitric oxide synthesis and host apoptotic events correlate with bleaching susceptibility in reef corals	CORAL REEFS	2014	EXPERIMENT	Acropora millepora	Pocillopora damicornis	Montipora digitata	NA	NA	NA	NA	NA	NA	NA	NA	NA	NA	NA	NA	NA	NA	NA	3	5	4	1	60	Fragment	DNS	DNS	DNS	DNS	5	DNS	3	NA	NA	DNS	DNS	NA	NA	Fragment	SNAP	SNAP, FROZ_80, 4DEGC, AB_BUFFER, HOMOG	NA	AB_BUFFER	SAW TOOTHED HOMOGENIZER	NA
9	Hill R, Szabo M, ur Rehman A, Vass I, Ralph PJ, Larkum WD	Inhibition of photosynthetic CO2 fixation in the coral Pocillopora damicornis and its relationship to thermal bleaching	JOURNAL OF EXPERIMENTAL BIOLOGY	2014	EXPERIMENT	Pocillopora damicornis	NA	NA	NA	NA	NA	NA	NA	NA	NA	NA	NA	NA	NA	NA	NA	NA	NA	1	4	DNS	1	DNS	Fragment	DNS	DNS	DNS	DNS	1	DNS	DNS	NA	NA	DNS	DNS	NA	NA	Fragment	AB_SW	AB ONLY?	NA	AB_SW	NA	NA
10	Hill R, Takahashi S	Photosystem II recovery in the presence and absence of chloroplast protein repair in the symbionts of corals exposed to bleaching conditions	CORAL REEFS	2014	EXPERIMENT	Pocillopora damicornis	Montipora digitata	Pavona decussata	Acropora millepora	NA	NA	NA	NA	NA	NA	NA	NA	NA	NA	NA	NA	NA	NA	4	4	16	1	256	Fragment	DNS	DNS	DNS	DNS	DNS	DNS	DNS	NA	NA	DNS	DNS	NA	NA	Fragment	AB_SW	AB, HOMOG	NA	AB_SW	ELECTRIC_HEIDOLPH diax 600	NA
11	Jones GB, Fischer E, Deschaseaux ESM, Harrison PL	The effect of coral bleaching on the cellular concentration of dimethylsullphoniopropionate in reef corals	JOURNAL OF MARINE BIOLOGY & ECOLOGY	2014	EXPERIMENT	Acropora intermedia	NA	NA	NA	NA	NA	NA	NA	NA	NA	NA	NA	NA	NA	NA	NA	NA	NA	1	2	DNS	1	17.5	Fragment	DNS	Bone cutters	DNS	DNS	4	DNS	DNS	NA	NA	DNS	PLASTIC BINS	NA	NA	Fragment	FROZ_80	FROZ_80, AB_CA, HOMOG	NA	AB_CA	BLENDER_DOMESTIC_MYSTRAL HAND BLENDER	NA
12	Jones GB, Fischer E, Deschaseaux ESM, Harrison PL	The effect of coral bleaching on the cellular concentration of dimethylsullphoniopropionate in reef corals		2014	SURVEY	Acropora intermedia	NA	NA	NA	NA	NA	NA	NA	NA	NA	NA	NA	NA	NA	NA	NA	NA	NA	1	20	1	1	20	Fragment	DNS	Bone cutters	DNS	DNS	4	DNS	DNS	90	BAGGED OR TUBED, ON ICE, FROZ_80	NA	NA	NA	NA	Fragment	FROZ_80	FROZ_80, WP_SW, HOMOG	NA	WP_SW	BLENDER_DOMESTIC	30
13.1	Kenkel CD, Sheridan C, Leal MC, Bhagooli R, Castillo KD, Kurata N, McGinty E, Goulet TL, Matz MV	Diagnostic gene expression biomarkers of coral thermal stress	MOLECULAR ECOLOGY RESOURCES	2014	EXPERIMENT	Porites astreoides	NA	NA	NA	NA	NA	NA	NA	NA	NA	NA	NA	NA	NA	NA	NA	NA	NA	1	11	4	1	44	Fragment	DNS	Hammer & chisel	DNS	DNS	DNS	3	DNS	NA	NA	DNS	DNS	razor blade	DNS	Tissue	PRESERVED/DIRECTLY EXTRACTED - not clear, TISSUE REMOVED RAZOR	RAZOR, NO PROC, EXTRACTED IMMEDIATELY	RNA later	NA	NA	NA
13.2	Kenkel CD, Sheridan C, Leal MC, Bhagooli R, Castillo KD, Kurata N, McGinty E, Goulet TL, Matz MV	Diagnostic gene expression biomarkers of coral thermal stress		2014	REPEAT	REPEAT	REPEAT	REPEAT	REPEAT	REPEAT	REPEAT	REPEAT	REPEAT	REPEAT	REPEAT	REPEAT	REPEAT	REPEAT	REPEAT	REPEAT	REPEAT	REPEAT	REPEAT	REPEAT	REPEAT	REPEAT	REPEAT	REPEAT	REPEAT	REPEAT	REPEAT	REPEAT	REPEAT	REPEAT	REPEAT	REPEAT	REPEAT	REPEAT	REPEAT	REPEAT	NA	NA	Tissue	PRESERVED_ETH_95%	PRESERVED_ETH_95	ETH_95	NA	NA	NA
14	Kenkel CD, Sheridan C, Leal MC, Bhagooli R, Castillo KD, Kurata N, McGinty E, Goulet TL, Matz MV	Diagnostic gene expression biomarkers of coral thermal stress		2014	SURVEY	Porites astreoides	NA	NA	NA	NA	NA	NA	NA	NA	NA	NA	NA	NA	NA	NA	NA	NA	NA	1	20	1	1	20	Fragment	DNS	Hammer & chisel	DNS	DNS	DNS	DNS	DNS	DNS	A tissue sample was collected fro each coral, brought to the surface and fixed in RNA-later.	NA	NA	tissue samples collected using HAC, no mention of sterility	DNS	Fragment	PRESERVED_RNAlater	PRESERVED_RNAlater, FROZ_20	RNA LATER	NA	NA	NA
15	Ladriere O, Penin L, van Lierde E, Vidal-Dupiol J et al.	Natural spatial variability of algal endosymbiont density in the coral Acropora Goniopora lobataiceps: a small-Seriatopora caliendrume approach along environmental gradients around Moorea (French Polynesia)	JOURNAL OF THE MARINE BIOLOGICAL ASSOCIATION OF THE UNITED KINGDOM	2014	SURVEY	Acropora Goniopora lobataiceps	NA	NA	NA	NA	NA	NA	NA	NA	NA	NA	NA	NA	NA	NA	NA	NA	NA	1	8	4	1	32	Fragment	DNS	DNS	DNS	dns	2	DNS	DNS	DNS	DNS	NA	NA	NA	NA	Fragment	FROZ_20	FROZ_20, WP_SW, HOMOG, FIXED	FORM_4%	WP_SW	GLASS	NA
16	Lutz A, Motti CA, Freckelton ML, van Oppen MJH, Miller DJ, Dunlap WC	Simultneous determination of coenzyme Q and plastoquinone redox states in the coral-Symbiodinium symbiosis during thermally induced bleaching	JOURNAL OF MARINE BIOLOGY & ECOLOGY	2014	EXPERIMENT	Acropora millepora	NA	NA	NA	NA	NA	NA	NA	NA	NA	NA	NA	NA	NA	NA	NA	NA	NA	1	5	DNS	1	120	Fragment	DNS	DNS	DNS	50	3.5	DNS	DNS	NA	NA	DNS	DNS	NA	NA	Fragment	SNAP	SNAP ONLY	NA	NA	NA	NA
17	Maor-landlaw K, Karako-Lampert S, Ben-Asher HW, Goffredo S, Falini G, Dubinsky Z, Levy O	Gene expression profiles during short-term heat stress in the red sea corral stylophora pistillata	Goniopora lobataAL CHANGE BIOLOGY	2014	EXPERIMENT	Stylophora pistillata	NA	NA	NA	NA	NA	NA	NA	NA	NA	NA	NA	NA	NA	NA	NA	NA	NA	1	1	42	1	42	Fragment	DNS	DNS	DNS	DNS	5	DNS	DNS	NA	NA	DNS	DNS	NA	NA	Fragment	PRESERVED_RNA_TRIZOL	PRESERVED_RNA_TRIZOL	TRIZOL	NA	NA	NA
18	Nir O, Gruber DF, Shemesh E, Glasser E, Tchernov D	Seasonal Mesophotic Coral Bleaching of Stylophora pistillata in the Northern Red Sea	PLOS ONE	2014	EXPERIMENT	Stylophora pistillata	NA	NA	NA	NA	NA	NA	NA	NA	NA	NA	NA	NA	NA	NA	NA	NA	NA	1	5	8	3.5	40	Fragment	DNS	DNS	DNS	DNS	5	DNS	DNS	NA	NA	DNS	BLACK COLLECTION BASKET	NA	NA	Fragment	SNAP	SNAP, FROZ_80, AB_DNS	DNS	AB_DNS	NA	NA
19	Nishida K, Iguchi A, Ishimura T, Sakai K, Suzuki A	Skeletal isotopic responses of the Scleractinian coral Isopora palifera to experimentally controlled water temperatures	GEOCHEMICAL JOURNAL	2014	EXPERIMENT	Isopora palifera	NA	NA	NA	NA	NA	NA	NA	NA	NA	NA	NA	NA	NA	NA	NA	NA	NA	1	1	30	1	30	Fragment	DNS	DNS	DNS	DNS	DNS	4	DNS	NA	NA	DNS	DNS	NA	DNS	Fragment	WP_DNS	AB, H3PO4 ACID?	NA	WP_DNS	NA	NA
20	Pinzon JH, Dornberger L, Beach-Letendre J, Weil E, Mydlarz LD	The link between immunity and life history traits in scleractinian corals	PEERJ	2014	SURVEY	Porites astreoides	Porites porites	Meandrina meandrites	Meandrina danae	Meandrina jacksoni	NA	NA	NA	NA	NA	NA	NA	NA	NA	NA	NA	NA	NA	5	18	1	1	56	Fragment	DNS	Hammer & chisel	DNS	DNS	DNS	5	DNS	DNS	WHIRL, COOLER ICE, TRANS, SNAP, FROZ_80, SHIPPED, FROZ_80	NA	NA	NA	NA	Fragment	SNAP	SNAP, FROZ_80, AB_BUFFER, FROZ_80, DEFROST, HOMOG	NA	AB_BUFFER	ELECTRIC	60
21	Rodolfo-Metalpa R, Hoogenboom MO, Rottier C, RamosEsplá A, Baker AC, Fine M, Ferrier-Pagès C	Thermally tolerant corals have limited capacity to acclimatize to future warming	Goniopora lobataAL CHANGE BIOLOGY	2014	EXPERIMENT	Oculina patagonica	NA	NA	NA	NA	NA	NA	NA	NA	NA	NA	NA	NA	NA	NA	NA	NA	NA	1	120	DNS		336	Fragment	DNS	DNS	DNS	DNS	DNS	3.5	DNS	NA	NA	DNS	DNS	NA	NA	Fragment	FROZ_80	FROZ_80, AB_SW, HOMOG	NA	AB_SW	POTTER ELVEHJEM	NA
22	Rosic N, Kaneiewska P, Chan CKK, Ling EYS, Edwards D, Dove S, Hoegh-Guldberg O	Early transcriptional changes in the reef-building coral Acropora aspera in response to thermal and nutrient stress	BMC GENOMICS	2014	EXPERIMENT	Acropora aspera	NA	NA	NA	NA	NA	NA	NA	NA	NA	NA	NA	NA	NA	NA	NA	NA	NA	1	5	DNS		DNS	Fragment	DNS	DNS	DNS	DNS	7	DNS	DNS	NA	NA	DNS	DNS	NA	NA	Fragment	FROZ_unknown	FROZ_DNS, AB_buffer,	NA	AB_BUFFER	NA	NA
23	Rubio-Portillo E, Yarza P, Penalver C, Ramos-Espla AA, Anton J	New insights into Oculina patagonica coral diseases and their associated Vibrio spp. communities	ISME JOURNAL	2014	SURVEY	Oculina patagonica	NA	NA	NA	NA	NA	NA	NA	NA	NA	NA	NA	NA	NA	NA	NA	NA	NA	1	18	1	5	90	Fragment	DNS	Hammer & chisel	DNS	DNS	DNS	DNS	DNS	120	BAGGED UNDERWATER, TRANSPORTED IN COOLER	NA	NA	NA	NA	Fragment	GR	GROUND	NA	NA	MORTAR AND PESTLE	NA
24	Schoepf V, McCulloch MT, Warner ME, Levas SJ, Matsui Y, Aschaffenburg MD, Grottoli AG	Short-Term Coral Bleaching Is Not Recorded by Skeletal Boron Isotopes	PLOS ONE	2014	EXPERIMENT	Porites divaricata	Orbicella faveolata	Porites astreoides	NA	NA	NA	NA	NA	NA	NA	NA	NA	NA	NA	NA	NA	NA	NA	3	9	7.5	1	202.5	Fragment	DNS	DNS	DNS	DNS	DNS	DNS	DNS	NA	NA	DNS	DNS	NA	NA	Fragment	FROZ_unknown	FROZ_DNS, WP	NA	WP_DNS	NA	NA
25	Tanaka Y, Inoue M, Nakamura T, Suzuki A, Sakai K	Loss of zooxanthallae in a coral under high seawater temperature and nutrient enrichment	JOURNAL OF MARINE BIOLOGY & ECOLOGY	2014	EXPERIMENT	Acropora tenuis	NA	NA	NA	NA	NA	NA	NA	NA	NA	NA	NA	NA	NA	NA	NA	NA	NA	1	3	16	1	48	Fragment	DNS	Pliers	DNS	DNS	2.5	DNS	1	NA	NA	30	DNS	NA	NA	Fragment	WP_DNS	AB > VARIOUS (FIXED FOR CELL DENSITY, NONE FOR CHL)	VAR	WP_DNS	NA	NA
26	Wall CB, Fan TY, Edmunds PJ	Ocean acidification has no effect on thermal bleaching in the coral Seriatopora caliendrum	CORAL REEFS	2014	EXPERIMENT	Seriatopora caliendrum	NA	NA	NA	NA	NA	NA	NA	NA	NA	NA	NA	NA	NA	NA	NA	NA	NA	1	60	1	1	60	Fragment	DNS	DNS	DNS	DNS	DNS	DNS	4	NA	NA	DNS	DNS	NA	NA	Fragment	AB_SW	AB, HOMOG	NA	AB_SW	ELECTRIC_POLYTRON PT2100	NA
27.1	Brown BE, Dunne RP, Edwards AJ, Sweet MJ, Phongsuwan N	Decadal environmental "memory" in a reef coral?	MARINE BIOLOGY	2015	SURVEY	Coelastrea aspera	NA	NA	NA	NA	NA	NA	NA	NA	NA	NA	NA	NA	NA	NA	NA	NA	NA	1	5	2	1	10	Fragment	DNS	Metal corer/HOLE PUNCH	DNS	20	DNS	DNS	1.5	DNS	DNS	NA	NA	HP	DNS	Fragment	PRESERVED_ETH_DNS	PRESERVED_ETH_DNS	ETH_DNS	NA	NA	NA
27.2	Brown BE, Dunne RP, Edwards AJ, Sweet MJ, Phongsuwan N	Decadal environmental "memory" in a reef coral?		2015	REPEAT	REPEAT	REPEAT	REPEAT	REPEAT	REPEAT	REPEAT	REPEAT	REPEAT	REPEAT	REPEAT	REPEAT	REPEAT	REPEAT	REPEAT	REPEAT	REPEAT	REPEAT	REPEAT	REPEAT	REPEAT	REPEAT	REPEAT	REPEAT	REPEAT	REPEAT	REPEAT	REPEAT	REPEAT	REPEAT	REPEAT	REPEAT	REPEAT	REPEAT	REPEAT	REPEAT	HP	DNS	Fragment	FIXED_FORMALIN_10%	FIXED, DECALC, HOMOG, PRESERVED	FORM_10%	NA	DISPERSER_ULeptastrea transversa TURRAX	NA
28.1	Buerger P, Schmidt GM, Wall M, Held C, Richter C	Temperature tolerance of the coral Porites lutea exposed to simulated large amplitude internal waves (LAIW)	JOURNAL OF MARINE BIOLOGY & ECOLOGY	2015	EXPERIMENT	Porites lutea	NA	NA	NA	NA	NA	NA	NA	NA	NA	NA	NA	NA	NA	NA	NA	NA	NA	1	10	4	1	40	Fragment	DNS	Hammer & chisel	DNS	DNS	DNS	9	DNS	NA	NA	DNS	DNS	CORE	DNS	Fragment	SNAP	SNAP, AB_SW, HOMOG	NA	AB_SW	ELECTRIC_TISSUE TEARER	NA
28.2	Buerger P, Schmidt GM, Wall M, Held C, Richter C	Temperature tolerance of the coral Porites lutea exposed to simulated large amplitude internal waves (LAIW)		2015	REPEAT	REPEAT	REPEAT	REPEAT	REPEAT	REPEAT	REPEAT	REPEAT	REPEAT	REPEAT	REPEAT	REPEAT	REPEAT	REPEAT	REPEAT	REPEAT	REPEAT	REPEAT	REPEAT	REPEAT	REPEAT	REPEAT	REPEAT	REPEAT	REPEAT	REPEAT	REPEAT	REPEAT	REPEAT	REPEAT	REPEAT	REPEAT	REPEAT	REPEAT	REPEAT	REPEAT	CORE	DNS	Fragment	PRESERVED_ETH_100%	PRESERVED_ETH_100, FROZ_20	ETH_100%	NA	NA	NA
29	Caroselli E, Falini G, Goffredo S, Dubinsky Z, Levy O	Negative response of photosynthesis to natural and projected high seawater temperatures estimated by pulse amplitude modulation fluorometry in a temperate coral	FRONTIERS IN PHYSIOLOGY	2015	EXPERIMENT	Balanophyllia europaea	NA	NA	NA	NA	NA	NA	NA	NA	NA	NA	NA	NA	NA	NA	NA	NA	NA	1	100	1	1	100	Fragment	DNS	DNS	DNS	DNS	DNS	DNS	DNS	NA	NA	DNS	DNS	NA	NA	Fragment	AB_SW	AB, HOMOG	NA	AB_SW	ELECTRIC	NA
30	Castrillon-Cifuentes AL, Muniz CG, Zapata FA	Reproductive patterns of the coral Pocillopora damicornis at Gorgona Island, Colombian Pacific Ocean	MARINE BIOLOGY RESEARCH	2015	SURVEY	Pocillopora damicornis	NA	NA	NA	NA	NA	NA	NA	NA	NA	NA	NA	NA	NA	NA	NA	NA	NA	1	5	3	8	156	Fragment	DNS	DNS	DNS	DNS	DNS	DNS	DNS	DNS	DNS	NA	NA	NA	NA	Fragment	FIXED_ZENKER'S SOL	FIXED, DECALC, PRESERVED, EMBEDDED, STAINED	ZENKERS, SOL, ETH_70%	NA	NA	NA
31	Cunning R, Gillette P, Capo T, Glavez K, Baker AC	Growth tradeoffs associated with thermotolerant symbionts in the coral Pocillopora damicornis are lost in warmer oceans	CORAL REEFS	2015	EXPERIMENT	Pocillopora damicornis	NA	NA	NA	NA	NA	NA	NA	NA	NA	NA	NA	NA	NA	NA	NA	NA	NA	1	58	20	1	1160	Fragment	DNS	DNS	DNS	DNS	3.5	DNS	DNS	NA	NA	DNS	DNS	DNS	DNS	Tissue	PRESERVED/DIRECTLY EXTRACTED - not clear DNS_PRESERVED? OR JUST EXTRACTED?	DNS_NONE_DNA EXTRACTED	DNS	NA	NA	NA
32	Dishon G, Fisch J, Horn I, Kaczmarek K, Bijma J, Gruber DF, Nir O, Popvich Y, Tchernov D	A novel paleo-bleaching proxy using boran isotopes and high-re	BIOGEOSCIENCES	2015	EXPERIMENT	Porites sp.	NA	NA	NA	NA	NA	NA	NA	NA	NA	NA	NA	NA	NA	NA	NA	NA	NA	1	2	DNS	1	77	Fragment	DNS	DNS	DNS	DNS	2	2	2	NA	NA	DNS	DNS	NA	NA	Fragment	AB_SW	AB, SLICED?	NA	NA	NA	NA
33	Gibbin EM, Putnam HM, Gates RD, Nitschke MR, Davy SK	Species-specific differences in thermal tolerance may define susceptibility to intracellular acidosis in reef corals	MARINE BIOLOGY	2015	EXPERIMENT	Montipora capitata	Pocillopora damicornis	NA	NA	NA	NA	NA	NA	NA	NA	NA	NA	NA	NA	NA	NA	NA	NA	2	DNS	50	1	100	Fragment	DNS	DNS	DNS	DNS	2	DNS	3	NA	NA	DNS	DNS	NA	NA	Fragment	FROZ_20	FROZEN_20, DEFROSTED, AB_SW	NA	AB_SW	NA	NA
34	Hawkins TD, Kreuger T, Wilkinson SP, Fisher PL, Davy SK	Antioxidant responses to heat and light stress differ with habitat in a common reef coral	CORAL REEFS	2015	EXPERIMENT	Stylophora pistillata	NA	NA	NA	NA	NA	NA	NA	NA	NA	NA	NA	NA	NA	NA	NA	NA	NA	1	8	16	1	128	Fragment	DNS	Wire cutters	DNS	DNS	4	DNS	DNS	NA	NA	DNS	LP	NA	NA	Fragment	SNAP	SNAP, FROZEN_80, 4DEGc, AB_buffer, HOMOG	NA	AB_BUFFER	ROTOR STRATOR	10
35	Higuchi T, Yuyama I, Nakamura T	The combined effects of nitrate with high temperature and high light intensity on coral bleaching and antioxidant enzyme activities	REGIONAL STUDIES IN MARINE SCIENCE	2015	EXPERIMENT	Montipora digitata	NA	NA	NA	NA	NA	NA	NA	NA	NA	NA	NA	NA	NA	NA	NA	NA	NA	1	DNS	DNS	1	36	Fragment	DNS	DNS	DNS	DNS	4	DNS	DNS	NA	NA	DNS	DNS	NA	NA	Fragment	AB_BUFFER	AB ONLY?	NA	AB_BUFFER	NA	NA
36	Hume BCC, D'Angelo CD, Stevens JR, Burt J, Wiedenmann J	Symbiodinium thermophilum sp. nov., a thermotolerant symbiotic alga prevalent in corals of the world's hottest sea, the Persian/Arabian Gulf	SCIENTIFIC REPORTS	2015	SURVEY	Acropora downingi	Cyphastrea microphthalma	Favia pallida	Platygyra daedalea	Porites harrisoni	Porites lutea	NA	NA	NA	NA	NA	NA	NA	NA	NA	NA	NA	NA	6	3	3	1	54	Fragment	DNS	Hammer & chisel	DNS	DNS	DNS	4	DNS	DNS	DNS	NA	NA	NA	NA	Fragment	PRESERVED_ETH_100%	PRESERVED_ETH_100%	ETH_100%	NA	NA	NA
37	Jones GB and King S	Dimethysulphoniopropionata (DMSP) as an indicator of bleaching tolerance in Scleractinian corals	JOURNAL OF MARINE SCIENCE AND ENGINEERING	2015	EXPERIMENT	Acropora millepora	NA	NA	NA	NA	NA	NA	NA	NA	NA	NA	NA	NA	NA	NA	NA	NA	NA	1	30	12	1	360	Fragment	DNS	DNS	DNS	DNS	4	DNS	DNS	NA	NA	DNS	DNS	NA	NA	Fragment	SNAP	SNAP, AB_SW, HOMOG	NA	AB_SW	BLENDER	NA
38	Kavousti J, Reimer JD, Tanaka Y, Nakamura T	Colony-specific investigations reveal highly variable responses among individual corals to ocean acidification and warming	MARINE ENVIRONMENTAL RESEARCH	2015	EXPERIMENT	Acropora digitifera	Montipora digitata	Porites cylindrica	NA	NA	NA	NA	NA	NA	NA	NA	NA	NA	NA	NA	NA	NA	NA	3	3	6	1	54	Fragment	DNS	DNS	DNS	DNS	DNS	DNS	DNS	NA	NA	DNS	DNS	NA	DNS	Fragment	DNS_PRESERVED? OR JUST EXTRACTED?	DNS_NONE_DNA EXTRACTED	DNS	NA	NA	NA
39	Kemp DW, Thornhill DJ, Rotjan RD, Iglesias-Prieto R, Fitt WK, Schmidt GW	Spatially distinct and regionally endemic Symbiodinium assemblages in the threatened Caribbean reef-building coral Orbicella faveolata	CORAL REEFS	2015	SURVEY	Orbicella faveolata	NA	NA	NA	NA	NA	NA	NA	NA	NA	NA	NA	NA	NA	NA	NA	NA	NA	1	4	26	1	661	Tissue	DNS	Syringes	DNS	DNS	NA	NA	NA	DNS	SYRINGES	NA	NA	SYRINGES	DNS	Tissue	PRESERVED_ETH_80% OR DMSO_20%	PRESERVED_ETH_80 OR DMSO-20	ETH_80% OR DMSO BUFFER PRESERVATIVE	NA	NA	NA
40	Krueger T, Hawkins TD, Becker S, Pontasch S, Dove S et al	Differential coral bleaching—Contrasting the activity and response of enzymatic antioxidants in symbiotic partners under thermal stress	COMPARATIVE BIOCHEMISTRY & PHYSIOLOGY - PART A	2015	EXPERIMENT	Acropora millepora	Montipora digitata	NA	NA	NA	NA	NA	NA	NA	NA	NA	NA	NA	NA	NA	NA	NA	NA	2	5	5?	1	50	Fragment	DNS	DNS	DNS	DNS	4	DNS	DNS	NA	NA	DNS	DNS	NA	NA	Fragment	WP_BUFFER	AB, SNAP, FROZ_80	EDTA	WP_BUFFER	NA	NA
41	Lee STM, Davy SK, Tang SL, Fan TY, Kench PS	Successive shifts in the microbial community of the surface mucus layer and tissues of the coral Acropora muricata under thermal stress	FEMS MICROBIOLOGY ECOLOGY	2015	EXPERIMENT	Acropora muricata	NA	NA	NA	NA	NA	NA	NA	NA	NA	NA	NA	NA	NA	NA	NA	NA	NA	1	5	DNS	1	100	Fragment	DNS	DNS	DNS	DNS	2	DNS	DNS	NA	NA	DNS	DNS	NA	MUCUS COLLETED IN STERILE BAG	Fragment	AB_BUFFER	AB, FROZ_20, HOMOG, DNA EXTRACTED	NA	AB_BUFFER	DNS	NA
42	Lee STM, Davy SK, Tang SL, Fan TY, Kench PS	Successive shifts in the microbial community of the surface mucus layer and tissues of the coral Acropora muricata under thermal stress		2015	EXPERIMENT	Acropora muricata	NA	NA	NA	NA	NA	NA	NA	NA	NA	NA	NA	NA	NA	NA	NA	NA	NA	1	5	DNS	1	100	Fragment	DNS	DNS	DNS	DNS	2	DNS	DNS	NA	NA	DNS	DNS	milked mucus into 1.5 ul tube	YES	Mucus	FROZ_20	FROZ_20, HOMOG, DNA EXTRACTED	NA	NA	DNS	NA
43.1	Lutz A, Raina JB, Motti CA, Miller DJ, van Oppen MJH	Host Coenzyme Q Redox State Is an Early Biomarker of Thermal Stress in the Coral Acropora millepora	PLOS ONE	2015	EXPERIMENT	Acropora millepora	NA	NA	NA	NA	NA	NA	NA	NA	NA	NA	NA	NA	NA	NA	NA	NA	NA	1	12	2	1	24	Fragment	DNS	DNS	DNS	50	5	DNS	DNS	NA	NA	DNS	DNS	NA	NA	Fragment	SNAP	SNAP ONLY	NA	NA	NA	NA
43.2	Lutz A, Raina JB, Motti CA, Miller DJ, van Oppen MJH	Host Coenzyme Q Redox State Is an Early Biomarker of Thermal Stress in the Coral Acropora millepora		2015	REPEAT	REPEAT	REPEAT	REPEAT	REPEAT	REPEAT	REPEAT	REPEAT	REPEAT	REPEAT	REPEAT	REPEAT	REPEAT	REPEAT	REPEAT	REPEAT	REPEAT	REPEAT	REPEAT	REPEAT	REPEAT	REPEAT	REPEAT	REPEAT	REPEAT	REPEAT	REPEAT	REPEAT	REPEAT	REPEAT	REPEAT	REPEAT	REPEAT	REPEAT	REPEAT	REPEAT	NA	NA	Fragment	AB_SW	AB, HOMOG, PRESERVED	FORM_10%	AB_SW	DISPERSER_ULeptastrea transversa TURRAX	NA
43.3	Lutz A, Raina JB, Motti CA, Miller DJ, van Oppen MJH	Host Coenzyme Q Redox State Is an Early Biomarker of Thermal Stress in the Coral Acropora millepora		2015	REPEAT	REPEAT	REPEAT	REPEAT	REPEAT	REPEAT	REPEAT	REPEAT	REPEAT	REPEAT	REPEAT	REPEAT	REPEAT	REPEAT	REPEAT	REPEAT	REPEAT	REPEAT	REPEAT	REPEAT	REPEAT	REPEAT	REPEAT	REPEAT	REPEAT	REPEAT	REPEAT	REPEAT	REPEAT	REPEAT	REPEAT	REPEAT	REPEAT	REPEAT	REPEAT	REPEAT	NA	NA	Fragment	DNS_PRESERVED? OR JUST EXTRACTED?	DNS_NONE_DNA EXTRACTED	DNS	NA	NA	NA
43.4	Lutz A, Raina JB, Motti CA, Miller DJ, van Oppen MJH	Host Coenzyme Q Redox State Is an Early Biomarker of Thermal Stress in the Coral Acropora millepora		2015	REPEAT	REPEAT	REPEAT	REPEAT	REPEAT	REPEAT	REPEAT	REPEAT	REPEAT	REPEAT	REPEAT	REPEAT	REPEAT	REPEAT	REPEAT	REPEAT	REPEAT	REPEAT	REPEAT	REPEAT	REPEAT	REPEAT	REPEAT	REPEAT	REPEAT	REPEAT	REPEAT	REPEAT	REPEAT	REPEAT	REPEAT	REPEAT	REPEAT	REPEAT	REPEAT	REPEAT	NA	NA	Fragment	FIXED_SOLUTION (1.2% glutaraldehyde + 0.5% paraformaldehyde)	FIXED, 4DEGC, DECALC, POST-FIXED, DEHYDRATED, INFILeptastrea transversaTED/CURED	FIXATIVE_1.2% glutaraldehyde + 0.5% paraformaldehyde	NA	NA	NA
44	Nguyen-Kim H, Bouvier T, Bouvier C et al	Viral and Bacterial Epibionts in Thermally-Stressed Corals	JOURNAL OF MARINE SCIENCE AND ENGINEERING	2015	EXPERIMENT	Fungia repanda	NA	NA	NA	NA	NA	NA	NA	NA	NA	NA	NA	NA	NA	NA	NA	NA	NA	1	DNS	1	1	6	Fragment	DNS	DNS	DNS	DNS	DNS	DNS	16	NA	NA	DNS	DNS	collected mucus using dessication method, collected in cryotubes, no description of sterility.	DNS	Mucus	FIXED_DNS	FIXED, STAINED	DNS	NA	NA	NA
45	Pereira NS, Sial AN, Kikuchi RKP, Ferreira VP, Ullmann CV, Frei R, Cunha AMC	Coral-based climate records from tropical South Atlantic: 2009/2010 ENSO event in C and O isotopes from Porites corals (Rocas Atoll, Brazil)	ANAIS DA ACADEMIA BRASILIERA DE CIENCIAS	2015	SURVEY	Porites astreoides	NA	NA	NA	NA	NA	NA	NA	NA	NA	NA	NA	NA	NA	NA	NA	NA	NA	1	2	1	1	2	Skeletal core	DNS	DNS	DNS	DNS	DNS	DNS	15	DNS	DNS	NA	NA	NA	NA	Skeletal core	DNS_CORES CUT	CUT/SLICED, AIR DRIED	NA	NA	NA	NA
46.1	Pernice M, Dunn SR, Tonk L, Dove S, Domart-Coulon I, Hoppe P, Schintlmeister A, Wagner M, Meibom A	A nanoSeriatopora caliendrume secondary ion mass spectrometry study of dinoflagellate functional diversity in reef building corals	ENVIRONMENTAL MICROBIOLOGY	2015	EXPERIMENT	Isopora palifera	NA	NA	NA	NA	NA	NA	NA	NA	NA	NA	NA	NA	NA	NA	NA	NA	NA	1	6	3	1	18	Fragment	DNS	Bone cutters	DNS	DNS	5.5	DNS	DNS	NA	NA	DNS	DNS	NA	NA	Fragment	FIXED_SOLUTION (2.5% gluaraldehyde + 1% formaldehyde)	FIXED, 4DEGC, EMBEDDED, DECALC, CUT, POSTFIXED, DEHYDRATED	FIXATIVE_2.5% gluaraldehyde + 1% formaldehyde	NA	NA	NA
46.2	Pernice M, Dunn SR, Tonk L, Dove S, Domart-Coulon I, Hoppe P, Schintlmeister A, Wagner M, Meibom A	A nanoSeriatopora caliendrume secondary ion mass spectrometry study of dinoflagellate functional diversity in reef building corals		2015	REPEAT	REPEAT	REPEAT	REPEAT	REPEAT	REPEAT	REPEAT	REPEAT	REPEAT	REPEAT	REPEAT	REPEAT	REPEAT	REPEAT	REPEAT	REPEAT	REPEAT	REPEAT	REPEAT	REPEAT	REPEAT	REPEAT	REPEAT	REPEAT	REPEAT	REPEAT	REPEAT	REPEAT	REPEAT	REPEAT	REPEAT	REPEAT	REPEAT	REPEAT	REPEAT	REPEAT	NA	NA	Fragment	FROZ_80	FROZ_80, AB_buffer	NA	AB_BUFFER	NA	NA
47	Pinzon JH, Kamel B, Burge CA, Harvell CD, Medina M, Weil E, Mydlarz LD	Whole transcriptome analysis reveals changes in expression of immune-related genes during and after bleaching in a reef-building coral	ROYAL SOCIETY OPEN SCIENCE	2015	SURVEY	Orbicella faveolata	NA	NA	NA	NA	NA	NA	NA	NA	NA	NA	NA	NA	NA	NA	NA	NA	NA	1	68	1	1	68	Fragment	Sterile bags, non-sterile tools	Hammer & chisel	DNS	DNS	DNS	2	DNS	DNS	TRANSPORTED TO LAB IN BAG OF SW, THEN SNAP	NA	NA	NA	STERILE BAG	Fragment	SNAP	SNAP, FROZ_80, GROUND, TRIZOL	NA	NA	MORTAR AND PESTLE	NA
48	Schoepf V, Grottoli AG, Levas SJ, Aschaffenburg MD, Baumann JH, Matsui Y, Warner ME	Annual coral bleaching and the long-term recovery capacity of coral	PROCEEDINGS OF THE ROYAL SOCIETY B	2015	EXPERIMENT	Porites divaricata	Porites astreoides	Orbicella faveolata	NA	NA	NA	NA	NA	NA	NA	NA	NA	NA	NA	NA	NA	NA	NA	3	9	7	1	189	Fragment	DNS	DNS	DNS	DNS	DNS	DNS	DNS	NA	NA	DNS	DNS	NA	NA	Fragment	FROZ_80	FROZ_80, VAR	NA	NA	NA	NA
49.1	Schoepf V, Stat M, Falter JL, McCulloch MT	Limits to the thermal tolerance of corals adapted to a highly fluctuating, natural extremem temeprature environment	SCIENTIFIC REPORTS	2015	EXPERIMENT	Acropora aspera	Dipsastrea sp.	NA	NA	NA	NA	NA	NA	NA	NA	NA	NA	NA	NA	NA	NA	NA	NA	2	11	4	1	88	Fragment	DNS	DNS	25	DNS	3.5	DNS	DNS	NA	NA	DNS	UNDER LIQUID NITROGEN	NA	NA	Fragment	SNAP	SNAP, AB_dns	NA	AB_DNS	NA	NA
49.2	Schoepf V, Stat M, Falter JL, McCulloch MT	Limits to the thermal tolerance of corals adapted to a highly fluctuating, natural extremem temeprature environment		2015	REPEAT	REPEAT	REPEAT	REPEAT	REPEAT	REPEAT	REPEAT	REPEAT	REPEAT	REPEAT	REPEAT	REPEAT	REPEAT	REPEAT	REPEAT	REPEAT	REPEAT	REPEAT	REPEAT	REPEAT	REPEAT	REPEAT	REPEAT	REPEAT	REPEAT	REPEAT	REPEAT	REPEAT	REPEAT	REPEAT	REPEAT	REPEAT	REPEAT	REPEAT	REPEAT	REPEAT	DNS	DNS	Tissue	PRESERVED_ETH_100%	PRESERVED_ETH_100%	ETH_100%	NA	NA	NA
50.1	Seneca FO and Palumbi SR	The role of transcriptome resilience in resistance of corals to bleaching	MOLECULAR ECOLOGY	2015	EXPERIMENT	Acropora hyacinthus	NA	NA	NA	NA	NA	NA	NA	NA	NA	NA	NA	NA	NA	NA	NA	NA	NA	1	20	12	1	240	Fragment	DNS	DNS	DNS	DNS	DNS	3	DNS	NA	NA	DNS	DNS	NA	NA	Fragment	PRESERVED_RNAstabilizing buffer	PRESERVED_RNAstabilizing buffer, FROZ_80	RNA later	NA	NA	NA
50.2	Seneca FO and Palumbi SR	The role of transcriptome resilience in resistance of corals to bleaching		2015	REPEAT	REPEAT	REPEAT	REPEAT	REPEAT	REPEAT	REPEAT	REPEAT	REPEAT	REPEAT	REPEAT	REPEAT	REPEAT	REPEAT	REPEAT	REPEAT	REPEAT	REPEAT	REPEAT	REPEAT	REPEAT	REPEAT	REPEAT	REPEAT	REPEAT	REPEAT	REPEAT	REPEAT	REPEAT	REPEAT	REPEAT	REPEAT	REPEAT	REPEAT	REPEAT	REPEAT	NA	NA	Fragment	PRESERVED_ETH_100%	PRESERVED_ETH_100%	ETH_100%	NA	NA	NA
51	Silverstein R, Cunning R, Baker AC	Change in algal symbiont communities after bleaching, not prior heat exposure, increases heat tolerance of reef corals	Goniopora lobataAL CHANGE BIOLOGY	2015	EXPERIMENT	Montastrea cavernosa	NA	NA	NA	NA	NA	NA	NA	NA	NA	NA	NA	NA	NA	NA	NA	NA	NA	1	9	?	1	137	Fragment	DNS	Metal corer	DNS	DNS	DNS	DNS	2.5	NA	NA	DNS	DNS	RAZOR	DNS	Tissue	PRESERVED_DNA BUFFER	PRESERVED	NA	NA	NA	NA
52	Suzuki T, Casareto, BE, Shioi Y	Finding of 132, 173 Cyclopheophorbide A Enol as a degreadation product oh chlorophyll in shrunk zooxanthellae of the coral Montipora digitata	JOURNAL OF PHYCOLOGY	2015	EXPERIMENT	Montipora digitata	NA	NA	NA	NA	NA	NA	NA	NA	NA	NA	NA	NA	NA	NA	NA	NA	NA	1	1	6	1	6	Fragment	DNS	DNS	DNS	DNS	5	DNS	DNS	NA	NA	DNS	DNS	NA	NA	Fragment	WP_SW	AB, HOMOG	DNS	WP_SW	GLASS	NA
53	Tout J, Siboni N, Messer LF, Garren M, Stocker R, Webster NS, Ralph PJ, Seymore JR	Increased seawater temperature increases the abundance and alters the structure of natural Vibrio populations associated with the coral Pocillopora damicornis	FRONTIERS IN MICROBIOLOGY	2015	EXPERIMENT	Pocillopora damicornis	NA	NA	NA	NA	NA	NA	NA	NA	NA	NA	NA	NA	NA	NA	NA	NA	NA	1	3	DNS	1	48	Fragment	DNS	Bone cutters	DNS	DNS	DNS	DNS	DNS	NA	NA	DNS	DNS	NA	STERILE HANDLING OF FRAGS USING FORCEPS	Fragment	PRESERVED_RNAlater	PRESERVED_RNAlater, FROZE_80, DEFROST, AB_SW, FILT, DNA EXTRACTED	RNA later	AB_SW	NA	NA
54	van Oppen MJH, Lukoschek V, Berkelmans R, Peplo LM, Jones AM	A population genetic assessment of coral recovery on highly disturbed reefs of the Keppel Island archipelago in the southern Great Barrier Reef	PEERJ	2015	SURVEY	Acropora millepora	NA	NA	NA	NA	NA	NA	NA	NA	NA	NA	NA	NA	NA	NA	NA	NA	NA	1	39.5	DNS	1	370	Fragment	DNS	DNS	DNS	DNS	DNS	DNS	DNS	DNS	DNS	NA	NA	NA	NA	Fragment	PRESERVED_ETH_100%	PRESERVED_ETH_100%	ETH_100%	NA	NA	NA
55	Weston AJ, Dunlap WC, BeLeptastrea transversan VH, Starcevic A, Hranueli D, Ward M, Long PF	Proteomics Links the Redox State to Calcium Signaling During Bleaching of the Scleractinian Coral Acropora microphthalma on Exposure to High Solar Irradiance and Thermal Stress	MOLECULAR & CELLULAR PROTEOMICS	2015	EXPERIMENT	Acropora microphthalma	NA	NA	NA	NA	NA	NA	NA	NA	NA	NA	NA	NA	NA	NA	NA	NA	NA	1	1	3	1	3	Fragment	DNS	DNS	DNS	DNS	DNS	DNS	DNS	NA	NA	DNS	DNS	NA	NA	Fragment	AB_SW	AB, HOMOG, FILT	PROTEIN PRESERVATIVE (EDTA AND EDTA & Halt Protease and Phosphatase Inhibitor)	AB_SW	DNS	NA
56	Zinke J, Hoell A, Lough LM, Feng M, Kuret AJ, Clarke H, Ricca V, Rankenburg K, McCulloch MT	Coral record of southeast Indian Ocean marine heatwaves with intensified Western Pacific temperature gradient	NATURE COMMUNICATIONS	2015	SURVEY	Porites sp.	NA	NA	NA	NA	NA	NA	NA	NA	NA	NA	NA	NA	NA	NA	NA	NA	NA	1	2	1	1	2	Skeletal core	DNS	Pneumatic Drill	150	DNS	NA	NA	7	DNS	DNS	NA	NA	NA	NA	Skeletal core	DNS_CORES CUT	CUT/SLICED, BLEACHED, DRIED	NA	NA	NA	NA
57	Agostini S, Fujimura H, Hayashi H, Fujita K	Mitochondrial electron transport activity and metabolism of experimentally bleached hermatypic corals	JOURNAL OF MARINE BIOLOGY & ECOLOGY	2016	EXPERIMENT	Galaxia fasicularis	Porites cylindrica	NA	NA	NA	NA	NA	NA	NA	NA	NA	NA	NA	NA	NA	NA	NA	NA	2	2	4	1	16	Fragment	DNS	DNS	DNS	DNS	DNS	DNS	DNS	NA	NA	DNS	DNS	NA	NA	Fragment	AB_BUFFER	AB, HOMOG	NA	AB_BUFFER	POTTER ELVEHJEM_TEFLON	NA
58	Aichelman HE, Townsend JE, Courtney TA, Baumann JH, Davies SW, Castillo KD	Heterotrophy mitigates the response of the temperate coral Oculina arbuscula to temperature stress	ECOLOGY & EVOLUTION	2016	EXPERIMENT	Orbicella arbuscula	NA	NA	NA	NA	NA	NA	NA	NA	NA	NA	NA	NA	NA	NA	NA	NA	NA	1	12	12	1	144	Fragment	DNS	Hammer & chisel	DNS	DNS	DNS	DNS	12.5	NA	NA	DNS	DNS	NA	NA	Fragment	AB_DNS	AB, FROZ_20, DEFROSTED, HOMOG	NA	AB_DNS	ELECTRIC_TISSUE TEARER	300
59.1	Ainsworth TD, Heron SF, Oritz JC, Mumby PJ, Grech A, Ogawa D, Eakin CM, Leggat W	Climate change disables coral bleachingprotection on the Great Barrier Reef	SCIENCE	2016	EXPERIMENT	Acropora aspera	NA	NA	NA	NA	NA	NA	NA	NA	NA	NA	NA	NA	NA	NA	NA	NA	NA	1	DNS	DNS	1	432	Fragment	DNS	DNS	DNS	DNS	7	DNS	DNS	NA	NA	DNS	DNS	NA	STERILE PBS BUFFER	Fragment	FIXED_PARAFORMALDEHYDE_4%	FIXED, 4DEGC, DECALCIFIED, EMBEDDED, STAINED	FORM_4%, ETH_50%	NA	NA	NA
59.2	Ainsworth TD, Heron SF, Oritz JC, Mumby PJ, Grech A, Ogawa D, Eakin CM, Leggat W	Climate change disables coral bleachingprotection on the Great Barrier Reef		2016	REPEAT	REPEAT	REPEAT	REPEAT	REPEAT	REPEAT	REPEAT	REPEAT	REPEAT	REPEAT	REPEAT	REPEAT	REPEAT	REPEAT	REPEAT	REPEAT	REPEAT	REPEAT	REPEAT	REPEAT	REPEAT	REPEAT	REPEAT	REPEAT	REPEAT	REPEAT	REPEAT	REPEAT	REPEAT	REPEAT	REPEAT	REPEAT	REPEAT	REPEAT	REPEAT	REPEAT	NA	NA	Fragment	SNAP	SNAP, FROZ_80, GROUND, DNA EXTRACTED	NA	NA	MORTAR AND PESTLE	NA
60	Barkley HC, Cohen AL	Skeletal records of community-level bleaching in Porites corals from Palau	CORAL REEFS	2016	SURVEY	Porites sp.	NA	NA	NA	NA	NA	NA	NA	NA	NA	NA	NA	NA	NA	NA	NA	NA	NA	1	101	1	1	101	Skeletal core	DNS	Pneumatic Drill	DNS	DNS	NA	NA	3.8	DNS	DNS	NA	NA	NA	NA	Skeletal core	DNS_CORES CUT	OVEN DRIED	NA	NA	NA	NA
61	Boulotte NM, Dalton SJ, Carroll AG, Harrison PL, Putnam HM, Peplow LM, van Oppen MJH	Exploring the symbiodinium rare biosPorites heronensise provides evidence for symbiont switching in reef-building corals	ISME JOURNAL	2016	SURVEY	Pocillopora damicornis	Stylophora pistillata	NA	NA	NA	NA	NA	NA	NA	NA	NA	NA	NA	NA	NA	NA	NA	NA	2	100	1	1	200	Fragment	DNS	DNS	DNS	DNS	DNS	DNS	DNS	DNS	DNS	NA	NA	NA	NA	Fragment	PRESERVED_ETH_100%	PRESERVED_ETH_100%	ETH_100%	NA	NA	NA
62	Brandtneris VW, Brandt ME, Glynn PW, Gyory J, Smith TB	Seasonal variability in calorimetric energy content of two Caribbean Mesophotic corals	PLOS ONE	2016	SURVEY	Orbicella faveolata	Agaricia lamarki	NA	NA	NA	NA	NA	NA	NA	NA	NA	NA	NA	NA	NA	NA	NA	NA	2	7	dns	5	206	Fragment	DNS	Hammer & chisel	DNS	DNS	DNS	22.5	25	DNS	WHIRLPAK ON ICE, NO SW	NA	NA	NA	NA	Fragment	AB_DI	AB, HOMOG, FROZ_20, DEFROSTED, FROZ-80, FREEZEDRIED	NA	AB_DI	DNS	NA
63	Cardini U, van Hoytema Nanne, Bednarz VN, Rix L, Foster RA, Al-Rshaidat MMD, Wild C	Microbial dinitrogen fixation in coral holobionts exposed to thermal stress and bleaching	ENVIRONMENTAL MICROBIOLOGY	2016	EXPERIMENT	Acropora hemprichii	Stylophora pistillata	NA	NA	NA	NA	NA	NA	NA	NA	NA	NA	NA	NA	NA	NA	NA	NA	2	16	1	1	32	Fragment	DNS	Bone cutters	DNS	DNS	7	DNS	DNS	NA	NA	DNS	PLASTIC BAG	NA	NA	Fragment	AB_SW	AB, HOMOG	NA	AB_SW	VORTEX	NA
64	Ezzat L, Towle E, Irisson JO, Langdon C, Ferrier-Pages C	The relationship between heterotrophic feeding and inorganic nutrient availability in the scleractinian coral T. reniformis under a short-term temperature increase	LIMNOLOGY & OCEANOGRAPHY	2016	EXPERIMENT	Turbinaria reniformis	NA	NA	NA	NA	NA	NA	NA	NA	NA	NA	NA	NA	NA	NA	NA	NA	NA	1	5	DNS	1	456	Fragment	DNS	DNS	DNS	DNS	DNS	DNS	4	NA	NA	DNS	DNS	NA	NA	Fragment	FROZ_20	FROZ_20, AB_SW, HOMOG	NA	AB_SW	POTTER ELVEHJEM	NA
65.1	Gierz SL, Gordon BR, Leggat W	Integral Light-Harvesting Complex Expression In Symbiodinium Within The Coral Acropora aspera Under Thermal Stress	SCIENTIFIC REPORTS	2016	EXPERIMENT	Acropora aspera	NA	NA	NA	NA	NA	NA	NA	NA	NA	NA	NA	NA	NA	NA	NA	NA	NA	1	DNS	DNS	1	312	Fragment	DNS	DNS	DNS	DNS	DNS	DNS	DNS	NA	NA	DNS	DNS	NA	NA	Fragment	WP_SW	AB, HOMOG	NA	WP_SW	BLENDER_IMMERSION	5
65.2	Gierz SL, Gordon BR, Leggat W	Integral Light-Harvesting Complex Expression In Symbiodinium Within The Coral Acropora aspera Under Thermal Stress		2016	REPEAT	REPEAT	REPEAT	REPEAT	REPEAT	REPEAT	REPEAT	REPEAT	REPEAT	REPEAT	REPEAT	REPEAT	REPEAT	REPEAT	REPEAT	REPEAT	REPEAT	REPEAT	REPEAT	REPEAT	REPEAT	REPEAT	REPEAT	REPEAT	REPEAT	REPEAT	REPEAT	REPEAT	REPEAT	REPEAT	REPEAT	REPEAT	REPEAT	REPEAT	REPEAT	REPEAT	NA	NA	Fragment	SNAP	SNAP, GROUND, FROZ_80, RNA EXTRACTED	NA	NA	MORTAR AND PESTLE	NA
66	Hagedorn M, Carter VL, Lager C, Camperio Ciani JF, Dygert AN, Schleiger RD, Henley EM	Potential bleaching effects on coral reproduction	REPRODUCTION, FERTILITY, AND DEVELOPMENT	2016	SURVEY	Montipora capitata	Fungia scutaria	NA	NA	NA	NA	NA	NA	NA	NA	NA	NA	NA	NA	NA	NA	NA	NA	2	47	1	1	94	Gametes	DNS	DNS	10	DNS	NA	NA	NA	DNS	DNS	NA	NA	FLOATING POTS	NA	Gametes	CRYOPRESERVED	Cryopreserved	NA	NA	NA	NA
67	Hetzinger S, Pfeiffer M, Dullo WC, Zinke J, Garbe-Schonberg D	A change in coral extension rates and stable isotopes after El Nino-induced coral bleaching and regional stress events	SCIENTIFIC REPORTS	2016	SURVEY	Pseudodiploria strigosa	Siderastrea siderea	NA	NA	NA	NA	NA	NA	NA	NA	NA	NA	NA	NA	NA	NA	NA	NA	1	2	1	1	2	Skeletal core	DNS	Drill	DNS	DNS	NA	NA	3.6	DNS	DNS	NA	NA	NA	NA	Skeletal core	DNS_CORES CUT	CUT/SLICED	NA	NA	NA	NA
68.1	Hoadley KD, Pettay DT, Grottoli AG, Cai WJ, Melman TF, Levas S, Schoepf V, Ding Q, Yuan X, Wang Y, matsui Y, Baumann JH, Warner ME	High-temperature acclimation strategies within the thermally tolerant endosymbiont Symbiodinium Turbinaria reniformischiiand its coral host, Turbinaria reniformis, differ with changing pCO 2 and nutrients	MARINE BIOLOGY	2016	EXPERIMENT	Turbinaria reniformis	NA	NA	NA	NA	NA	NA	NA	NA	NA	NA	NA	NA	NA	NA	NA	NA	NA	1	6	8	1	48	Fragment	DNS	DNS	DNS	DNS	DNS	DNS	DNS	NA	NA	DNS	DNS	NA	NA	Fragment	SNAP	SNAP, WP_SW, HOMOG	DNS	WP_SW	ELECTRIC_TISSUE TEARER	NA
68.2	Hoadley KD, Pettay DT, Grottoli AG, Cai WJ, Melman TF, Levas S, Schoepf V, Ding Q, Yuan X, Wang Y, matsui Y, Baumann JH, Warner ME	High-temperature acclimation strategies within the thermally tolerant endosymbiont Symbiodinium Turbinaria reniformischiiand its coral host, Turbinaria reniformis, differ with changing pCO 2 and nutrients		2016	REPEAT	REPEAT	REPEAT	REPEAT	REPEAT	REPEAT	REPEAT	REPEAT	REPEAT	REPEAT	REPEAT	REPEAT	REPEAT	REPEAT	REPEAT	REPEAT	REPEAT	REPEAT	REPEAT	REPEAT	REPEAT	REPEAT	REPEAT	REPEAT	REPEAT	REPEAT	REPEAT	REPEAT	REPEAT	REPEAT	REPEAT	REPEAT	REPEAT	REPEAT	REPEAT	REPEAT	NA	NA	Fragment	DNS_PRESERVED? OR JUST EXTRACTED?	DNS_NONE_DNA EXTRACTED	NA	NA	NA	NA
69	Howells AJ, Ketchum RN, Bauman AG, Mustafa Y, Watkins KD, Burt JA	Species-specific Turbinaria reniformisds in the reproductive output of corals across environmental gradients and bleaching histories	MARINE POLLUTION BULLETIN	2016	SURVEY	Acropora downingi	Cyphastrea microphthalma	Platygyra daedalea	NA	NA	NA	NA	NA	NA	NA	NA	NA	NA	NA	NA	NA	NA	NA	3	61	1	1	859	Fragment	DNS	DNS	DNS	DNS	DNS	7.5	DNS	DNS	DNS	NA	NA	DNS	DNS	Fragment	FIXED_FORMALIN_10% SW	FIXED, PRESERVED, DECALC, CUT	DNS	NA	NA	NA
70	Kemp DW, Colella MA, Bartlett LA, Ruzicka RR, Porter JW, Fitt WK	Life after cold death: reef coral and coral reef responses to the 2010 cold water anomaly in the Florida Keys	ECOSPorites heronensisE	2016	SURVEY	Acropora cervicornis	Orbicella annularis	Orbicella faveolata	Porites astreoides	Siderastrea siderea	NA	NA	NA	NA	NA	NA	NA	NA	NA	NA	NA	NA	NA	5	6	4	3.5	105	Fragment	DNS	Hammer & chisel	DNS	DNS	DNS	DNS	DNS	75	SW FILLED COOLER	NA	NA	NA	NA	Fragment	WP_VAR	AB, VARIOUS METHODS	NA	WP_SW	NA	NA
71	Liu Z, Chen C, Gao L, Zhang Y, Pei J, Ren C, Hu C	Differences in microbial communities between healthy and bleached coral Acropora solitaryensis from Xisha Islands, South China Sea	MARINE BIOLOGY RESEARCH	2016	SURVEY	Acropora solitaryensis	NA	NA	NA	NA	NA	NA	NA	NA	NA	NA	NA	NA	NA	NA	NA	NA	NA	1	DNS	DNS	DNS	DNS	Fragment	DNS	DNS	DNS	DNS	DNS	DNS	DNS	DNS	PLASTIC BAGS IN ICE BOX	NA	NA	NA	NA	Fragment	GR?	GR? WASHED_BUFFER, TISSUE CUT, GROUND, DNA EXTRACTED	NA	NA	MORTAR AND PESTLE	NA
72	Mahmoud HM, Al-Sarraf M	Molecular phylogeny and community fingerprinting of coral associated Symbiodinium north of the Arabian Gulf	MARINE POLLUTION BULLETIN	2016	SURVEY	Platygyra daedalea	Cyphastrea microphthalma	Coscinaraea columna	Stylophora pistillata	Plesiastrea versipora	Turbinaria peltata	Dipsastrea pallida	Acropora downingi	Porites harrisoni	Goniopora lobata	Favites pentagona	Psammocora contigua	Pavona decussata	Acropora arabiensis	NA	NA	NA	NA	14	3	3	1	432	Fragment	Sterile bag	DNS	DNS	DNS	1	DNS	DNS	DNS	ON ICE	NA	NA	NA	STERILE WATER	Fragment	AB_SW	AB, GROUND,[DNA ONLY: BUFFER, FROZ_20]	NA	AB_SW	MORTAR AND PESTLE	NA
73	Mahmoud HM, Al-Sarraf M	Molecular phylogeny and community fingerprinting of coral associated Symbiodinium north of the Arabian Gulf		2016	SURVEY	Platygyra daedalea	Cyphastrea microphthalma	Coscinaraea columna	Stylophora pistillata	Plesiastrea versipora	Turbinaria peltata	Dipsastrea pallida	Acropora downingi	Porites harrisoni	Goniopora lobata	Favites pentagona	Psammocora contigua	Pavona decussata	Acropora arabiensis	NA	NA	NA	NA	14	3	3	1	432	Mucus	Sterile	Syringes	DNS	DNS	NA	NA	NA	DNS	ON ICE	NA	NA	SYRINGES	STER	Mucus	FIXED_FORMALDEHYDE_2%	FIXED, FROZ_20	FORM_2%	NA	NA	NA
74	Maor-Landaw K, Levy O	Gene expression profiles during short-term heat stress; branching vs. massive Scleractinian corals of the Red Sea	PEERJ	2016	EXPERIMENT	Stylophora pistillata	Acropora eurystoma	Porites sp.	NA	NA	NA	NA	NA	NA	NA	NA	NA	NA	NA	NA	NA	NA	NA	3	1	32	1	96	Fragment	DNS	Drill core	DNS	25	5	DNS	DNS	NA	NA	DNS	DNS	NA	NA	Fragment	PRESERVED_RNA_TRIZOL	PRESERVED_RNA_TRIZOL	TRIZOL	NA	NA	NA
75	Noonan SHC, Fabricius KE	Ocean acidification affects productivity but not the severity of thermal bleaching in some tropical corals	ICES JOURNAL OF MARINE SCIENCE	2016	EXPERIMENT	Seriatopora hystrix	Acropora millepora	NA	NA	NA	NA	NA	NA	NA	NA	NA	NA	NA	NA	NA	NA	NA	NA	2	18	4	1	144	Fragment	DNS	DNS	DNS	DNS	5	DNS	DNS	NA	NA	DNS	DNS	NA	NA	Fragment	SNAP	SNAP, FROZ_80, WP, HOMOG	NA	WP	DNS	NA
76	Ricaurte M, Schizas NV, Ciborowski P, Boukli NM	Proteomic analysis of bleached and unbleached Acropora palmata, a threatened coral species of the Caribbean	MARINE POLLUTION BULLETIN	2016	SURVEY	Acropora palmata	NA	NA	NA	NA	NA	NA	NA	NA	NA	NA	NA	NA	NA	NA	NA	NA	NA	1	6	1	1	6	Fragment	DNS	Hammer & chisel	DNS	DNS	DNS	DNS	DNS	DNS	PLASTIC BAG WITH SW, ON ICE	NA	NA	NA	NA	Fragment	GR	GROUND_BUFFER, SONICATION	NA	NA	MORTAR AND PESTLE	NA
77.1	Rodríguez‐Troncoso AP, Carpizo‐Ituarte E, Cupul‐Magaña AL	Physiological response to high temperature in the Tropical Eastern Pacific coral Pocillopora verrucosa	MARINE ECOLOGY	2016	EXPERIMENT	Pocillopora verucosa	NA	NA	NA	NA	NA	NA	NA	NA	NA	NA	NA	NA	NA	NA	NA	NA	NA	1	25	DNS	1	108	Fragment	DNS	DNS	DNS	DNS	3.5	DNS	DNS	NA	NA	DNS	PLASTIC BAGS, THEN INTO BOAT, OUT OF BAGS AND INTO COOLER WITH SW	NA	NA	Fragment	FIXED_FORMALDEHYDE_10%	FIXED, DECALC	FORM_10%	NA	NA	NA
77.2	Rodríguez‐Troncoso AP, Carpizo‐Ituarte E, Cupul‐Magaña AL	Physiological response to high temperature in the Tropical Eastern Pacific coral Pocillopora verrucosa		2016	REPEAT	REPEAT	REPEAT	REPEAT	REPEAT	REPEAT	REPEAT	REPEAT	REPEAT	REPEAT	REPEAT	REPEAT	REPEAT	REPEAT	REPEAT	REPEAT	REPEAT	REPEAT	REPEAT	REPEAT	REPEAT	REPEAT	REPEAT	REPEAT	REPEAT	REPEAT	REPEAT	REPEAT	REPEAT	REPEAT	REPEAT	REPEAT	REPEAT	REPEAT	REPEAT	REPEAT	NA	NA	Fragment	FROZ_20	FROZ_20	NA	NA	NA	NA
78	Russell B, Dierssen HM, LaJeunesse TC, Hoadley KD, Warner ME, Kemp DW, Bateman TG	Spectral reflectance of Palauan reef-building coral with different symbionts in response to elevated temperature	REMOTE SENSING	2016	EXPERIMENT	Cyphastrea serailia	Pachyseris rugosa	NA	NA	NA	NA	NA	NA	NA	NA	NA	NA	NA	NA	NA	NA	NA	NA	2	8	3	1	48	Fragment	DNS	DNS	DNS	DNS	3	DNS	3	NA	NA	DNS	SHADED CONTAINERS	NA	NA	Fragment	AB_SW	AB, FIXED	GLUTARALDEHYDE_1%	AB_SW	NA	NA
79	Sagar N, Hetzinger S, Pfeiffer M, Ahmad SM, Dullo WC, Garbe-Schonberg D	High-resolution Sr/Ca ratios in a Porites lutea coral from Lakshadweep Archipelago, southeast Arabian Sea: an example from a region experiencing steady rise in the reef temperature	JOURNAL OF GEOPHYSICAL RESEARCH	2016	SURVEY	Porites lutea	NA	NA	NA	NA	NA	NA	NA	NA	NA	NA	NA	NA	NA	NA	NA	NA	NA	1	1	1	1	1	Skeletal core	DNS	Drill	DNS	DNS	NA	NA	5	DNS	DNS	NA	NA	NA	NA	Skeletal core	DNS_CORES CUT	CUT/SLICED, RINSES, CLEANED, BLEACHED, RINSED, DRIED	NA	NA	NA	NA
80	Schmidt GM, Wall M, Taylor M, Jantzen C, Richter C	Large-amplitude internal waves sustain coral health during thermal stress	CORAL REEFS	2016	SURVEY	Porites lutea	Pocillopora meandrina	NA	NA	NA	NA	NA	NA	NA	NA	NA	NA	NA	NA	NA	NA	NA	NA	2	48	1	1	96	Fragment	DNS	Hammer & chisel	DNS	DNS	DNS	DNS	DNS	DNS	DNS	NA	NA	NA	NA	Fragment	AB_SW	AB, SNAP, FROZ_20, DEFROSTED, HOMOG	NA	AB_SW	DISPERSER_ULeptastrea transversa TURRAX	NA
81	Sogin EM, Putnam HM, Anderson PE, Gates RD	Metabolomic signatures of increases in temperature and ocean acidification from the reef-building coral, Pocillopora damicornis	METABOLOMICS	2016	EXPERIMENT	Pocillopora damicornis	NA	NA	NA	NA	NA	NA	NA	NA	NA	NA	NA	NA	NA	NA	NA	NA	NA	1	DNS	DNS	1	22	Fragment	DNS	DNS	DNS	DNS	DNS	DNS	DNS	NA	NA	DNS	DNS	NA	NA	Fragment	SNAP	SNAP, GROUND	NA	NA	DNS	NA
82.1	Tremblay P, Gori A, Maguer JF, Hoogenboom M, Ferrier-Pages C	Heterotrophy promotes the re-establishment of photosynthate translocation in a symbiotic coral after heat stress	SCIENTIFIC REPORTS	2016	EXPERIMENT	Stylophora pistillata	NA	NA	NA	NA	NA	NA	NA	NA	NA	NA	NA	NA	NA	NA	NA	NA	NA	1	4	52	1	208	Fragment	DNS	DNS	DNS	DNS	DNS	DNS	DNS	NA	NA	DNS	DNS	NA	NA	Fragment	FROZ_20	FROZ_20, AB_SW, HOMOG	NA	AB_SW	DNS	NA
82.2	Tremblay P, Gori A, Maguer JF, Hoogenboom M, Ferrier-Pages C	Heterotrophy promotes the re-establishment of photosynthate translocation in a symbiotic coral after heat stress		2016	REPEAT	REPEAT	REPEAT	REPEAT	REPEAT	REPEAT	REPEAT	REPEAT	REPEAT	REPEAT	REPEAT	REPEAT	REPEAT	REPEAT	REPEAT	REPEAT	REPEAT	REPEAT	REPEAT	REPEAT	REPEAT	REPEAT	REPEAT	REPEAT	REPEAT	REPEAT	REPEAT	REPEAT	REPEAT	REPEAT	REPEAT	REPEAT	REPEAT	REPEAT	REPEAT	REPEAT	NA	NA	Fragment	AB_SW	AB, HOMOG, SNAP, FD	NA	AB_SW	POTTER ELVEHJEM	NA
83	van de Water JAJM, Lamb JB, Heron SF, van Oppen MJH, Willis BL	Temporal patterns in innate immunity parameters in reef-building corals and linkages with local climatic conditions	ECOSPorites heronensisE	2016	SURVEY	Acropora millepora	Echinopora mammiformis	Porites cylindrica	NA	NA	NA	NA	NA	NA	NA	NA	NA	NA	NA	NA	NA	NA	NA	3	9	1	9	243	Fragment	DNS	Bone cutters	DNS	DNS	5	DNS	DNS	DNS	PLASTIC BAG UNDER WATER > CRYOTUBE > SNAP	NA	NA	NA	NA	Fragment	SNAP	SNAP, FROZ_80, DEFROSTED, AB_BUFFER, HOMOG	NA	AB_BUFFER	ELECTRIC	45
84	von Reumont J, Hetzinger S, Garbe-Schonberg D, Manfrino C, Dullo WC	Impact of warming events on reef-Seriatopora caliendrume temperature variability as captured in two Little Cayman coral Sr/Ca records	GEOCHEMISTY, GEOPHYSICS, GEOSYSTEMS	2016	SURVEY	Pseudodiploria strigosa	NA	NA	NA	NA	NA	NA	NA	NA	NA	NA	NA	NA	NA	NA	NA	NA	NA	1	2	1	1	2	Skeletal core	DNS	Pneumatic Drill	DNS	100	NA	NA	3.6	DNS	DNS	NA	NA	NA	NA	Skeletal core	DNS_CORES CUT	CUT/SLICED	NA	NA	NA	NA
85	Baghdasarian G, Osberg A, Mihora D, Putnam H, Gates RD, Edmunds PJ	Effects of temperature and pCO2 on population regulation of Symbiodinium spp. in a tropical reef coral	BIOLOGICAL BULLETIN	2017	EXPERIMENT	Seriatopora caliendrum	NA	NA	NA	NA	NA	NA	NA	NA	NA	NA	NA	NA	NA	NA	NA	NA	NA	1	48	1	1	48	Fragment	DNS	DNS	DNS	DNS	DNS	DNS	4	NA	NA	DNS	DNS	NA	NA	Fragment	AB_SW	AB, HOMOG	DNS	AB_SW	ELECTRIC	NA
86	Bellworthy, J, Fine, M	Beyond peak summer temperatures, branching corals in the Gulf of Aqaba are resilient to thermal stress but sensitive to high light	CORAL REEFS	2017	EXPERIMENT	Stylophora pistillata	NA	NA	NA	NA	NA	NA	NA	NA	NA	NA	NA	NA	NA	NA	NA	NA	NA	1	12	DNS	1	60	Fragment	DNS	DNS	DNS	DNS	DNS	DNS	DNS	NA	NA	DNS	DNS	NA	NA	Fragment	AB_DNS	AB ONLY?	DNS	AB_DNS	NA	NA
87	Bessel-Browne P, Negri AP, Fisher R, Clode PL, Jones R	Cumulative impacts: thermally bleached corals have reduced capacity to clear deposited sedimetn	SCIENTIFIC REPORTS	2017	EXPERIMENT	Acropora millepora	Porites sp.	Turbinaria reniformis	NA	NA	NA	NA	NA	NA	NA	NA	NA	NA	NA	NA	NA	NA	NA	3	11	8	1	264	Fragment	DNS	Pneumatic Drill & HAND	DNS	DNS	DNS	7	DNS	NA	NA	DNS	DNS	NA	NA	Fragment	SNAP	SNAP, FROZ_80, AB_CA	NA	AB_CA	NA	NA
88	Biscéré T Lorrainc A, Rodolfo-Metalpaa R, Gilbert A, Wright A, Devissia C, Peignona C, Farmane R, Duvieilbourg E, Payria C, Houlbrèque F	Nickel and ocean warming affect scleractinian coral growth	MARINE POLLUTION BULLETIN	2017	EXPERIMENT	Acropora muricata	NA	NA	NA	NA	NA	NA	NA	NA	NA	NA	NA	NA	NA	NA	NA	NA	NA	1	10	16	1	160	Fragment	DNS	Pliers	DNS	DNS	2	DNS	DNS	NA	NA	DNS	DNS	NA	NA	Fragment	FROZ_20	FROZ_20, AB_DNS, HOMOG	NA	AB_DNS	POTTER ELVEHJEM	NA
89.1	Bonesso JL, Leggat W, Ainsworth TD	Exposure to elevated sea-surface temperatures below the bleaching threshold impairs coral recovery and regeneration following injury	PEERJ	2017	EXPERIMENT	Acropora aspera	NA	NA	NA	NA	NA	NA	NA	NA	NA	NA	NA	NA	NA	NA	NA	NA	NA	1	20	1	1	20	Fragment	DNS	DNS	DNS	DNS	DNS	DNS	20	NA	NA	DNS	DNS	NA	NA	Fragment	FIXED_PARAFORMALDEHYDE_4%	FIXED, 4DEGc	4% paraformaldehyde (PFA) and 3 × Phosphate Buffer Saline (PBS)	NA	NA	NA
89.2	Bonesso JL, Leggat W, Ainsworth TD	Exposure to elevated sea-surface temperatures below the bleaching threshold impairs coral recovery and regeneration following injury		2017	REPEAT	REPEAT	REPEAT	REPEAT	REPEAT	REPEAT	REPEAT	REPEAT	REPEAT	REPEAT	REPEAT	REPEAT	REPEAT	REPEAT	REPEAT	REPEAT	REPEAT	REPEAT	REPEAT	REPEAT	REPEAT	REPEAT	REPEAT	REPEAT	REPEAT	REPEAT	REPEAT	REPEAT	REPEAT	REPEAT	REPEAT	REPEAT	REPEAT	REPEAT	REPEAT	REPEAT	NA	NA	Fragment	SNAP	SNAP, FROZ_80, GROUND, mRNA EXTRACTED	NA	NA	MORTAR AND PESTLE	NA
90	Clarke H, D'Olivo JP, Flater J, Zinke J, Lowe R, McCulloch M	Differential response of corals to regional mass-warming events as evident from skeletal Sr/Ca and Mg/Ca rations	GEOCHEMISTY, GEOPHYSICS, GEOSYSTEMS	2017	SURVEY	Porites sp.	NA	NA	NA	NA	NA	NA	NA	NA	NA	NA	NA	NA	NA	NA	NA	NA	NA	1	4	1	1	4	Skeletal core	DNS	DNS	DNS	DNS	NA	NA	DNS	DNS	DNS	NA	NA	NA	NA	Skeletal core	DNS_CORES CUT	CUT/SLICED, BLEACHED, RINSED_DI, OVEN DRIED	NA	NA	NA	NA
91	Courtial L, Picco V, Grover R, Cormerais Y, Rottier C, Labbe A, Pagès G, Ferrier-Pagès1 C	The c-Jun N-terminal kinase prevents oxidative stress induced by UV and thermal stresses in corals and human cells	SCIENTIFIC REPORTS	2017	EXPERIMENT	Stylophora pistillata	NA	NA	NA	NA	NA	NA	NA	NA	NA	NA	NA	NA	NA	NA	NA	NA	NA	1	3	DNS	1	50	Fragment	DNS	DNS	DNS	DNS	DNS	DNS	DNS	NA	NA	DNS	DNS	NA	NA	Fragment	SNAP	SNAP, FROZ_80, AB_BUFFER	NA	AB_BUFFER	NA	NA
92	D'Olivo JP, McCulloch MT	Response of coral calcification and calcifying fluid composition to thermally induced bleaching stress	SCIENTIFIC REPORTS	2017	SURVEY	Porites sp.	NA	NA	NA	NA	NA	NA	NA	NA	NA	NA	NA	NA	NA	NA	NA	NA	NA	1	1	1	1	1	Skeletal core	DNS	DNS	22	DNS	NA	NA	DNS	DNS	DNS	NA	NA	NA	NA	Skeletal core	DNS_CORES CUT	CUT/SLICED, BLEACHED, RINSED	NA	NA	NA	NA
93	da Silva Fonsecaa J, Fernandes de Barros Marangoni L, Aparecida Marques J, Bianchinia A	Effects of increasing temperature alone and combined with copper exposure on biochemical and physiological parameters in the zooxanthellate scleractinian coral Mussismilia harttii	AQUATIC TOXICOLOGY	2017	EXPERIMENT	Mussismilia hartii	NA	NA	NA	NA	NA	NA	NA	NA	NA	NA	NA	NA	NA	NA	NA	NA	NA	1	6	DNS	1	63	Fragment	DNS	DNS	DNS	DNS	DNS	DNS	DNS	NA	NA	DNS	DNS	NA	NA	Fragment	GR	GROUND, LIQn, HOMOG	DNS	NA	SONICATOR	NA
94.1	Gardner S , Raina JB, Nitschke MR, Nielsen DA, Stat M, Motti CA, Ralph PJ and Petrou K	A multi-trait systems approach reveals a response cascade to bleaching in corals	BMC BIOLOGY	2017	EXPERIMENT	Acropora millepora	Stylophora pistillata	NA	NA	NA	NA	NA	NA	NA	NA	NA	NA	NA	NA	NA	NA	NA	NA	2	5	2	1	200	Fragment	DNS	DNS	DNS	DNS	3	DNS	DNS	NA	NA	DNS	DNS	NA	NA	Fragment	SNAP	SNAP, FROZ_80	NA	NA	NA	NA
94.2	Gardner S , Raina JB, Nitschke MR, Nielsen DA, Stat M, Motti CA, Ralph PJ and Petrou K	A multi-trait systems approach reveals a response cascade to bleaching in corals		2017	REPEAT	REPEAT	REPEAT	REPEAT	REPEAT	REPEAT	REPEAT	REPEAT	REPEAT	REPEAT	REPEAT	REPEAT	REPEAT	REPEAT	REPEAT	REPEAT	REPEAT	REPEAT	REPEAT	REPEAT	REPEAT	REPEAT	REPEAT	REPEAT	REPEAT	REPEAT	REPEAT	REPEAT	REPEAT	REPEAT	REPEAT	REPEAT	REPEAT	REPEAT	REPEAT	REPEAT	NA	NA	Fragment	PRESERVED_METHANOL	PRESERVED_METHANOL, FROZ_20	METHANOL	NA	NA	NA
94.3	Gardner S , Raina JB, Nitschke MR, Nielsen DA, Stat M, Motti CA, Ralph PJ and Petrou K	A multi-trait systems approach reveals a response cascade to bleaching in corals		2017	REPEAT	REPEAT	REPEAT	REPEAT	REPEAT	REPEAT	REPEAT	REPEAT	REPEAT	REPEAT	REPEAT	REPEAT	REPEAT	REPEAT	REPEAT	REPEAT	REPEAT	REPEAT	REPEAT	REPEAT	REPEAT	REPEAT	REPEAT	REPEAT	REPEAT	REPEAT	REPEAT	REPEAT	REPEAT	REPEAT	REPEAT	REPEAT	REPEAT	REPEAT	REPEAT	REPEAT	NA	NA	Fragment	AB_SW	AB, HOMOG	NA	AB_SW	DNS	NA
95	Grottoli A, Tchernov D, Winters G	Physiological and Biogeochemical Responses of Super-Corals to Responses of Super-Corals to Thermal Stress from the Northern Gulf of Aqaba, Red Sea	FRONTIERS IN MARINE SCIENCE	2017	EXPERIMENT	Stylophora pistillata	Pocillopora damicornis	Dipsastrea favus	NA	NA	NA	NA	NA	NA	NA	NA	NA	NA	NA	NA	NA	NA	NA	3	5	2	1	34	Fragment	DNS	DNS	DNS	DNS	6	DNS	DNS	NA	NA	DNS	DNS	NA	NA	Fragment	FROZ_80	FROZ_80	NA	NA	NA	NA
96	Hillyer KE, Dias DA, Lutz A, Wilkinson SP, Roessner U et al.	Metabolite profiling of symbiont and host during thermal stress and bleaching in the coral Acropora aspera	CORAL REEFS	2017	EXPERIMENT	Acropora aspera	NA	NA	NA	NA	NA	NA	NA	NA	NA	NA	NA	NA	NA	NA	NA	NA	NA	1	6	9	1	54	Fragment	DNS	DNS	DNS	DNS	8	DNS	DNS	NA	NA	DNS	DNS	NA	NA	Fragment	SNAP	SNAP, FROZ_80, AB_DI, HOMOG	NA	AB_DI	SAW TOOTHED HOMOGENIZER	10
97	Liang J, Yu Kefu, Wang Y, Huang X, Huang W, Qin Z, Pan Z, Yao Q, Wang W, Wu Z	Distinct bacterial communities associated with massive and branching scleractinian corals and potential linkages to coral susceptability to thermal or cold stress	FRONTIERS IN MICROBIOLOGY	2017	SURVEY	Goniastrea edwardsi	Platygyra crosslandi	Echinopora gemmacea	Porites rus	Porites lutea	Fungia scutaria	Fungia fungites	Leptoria phrygia	Acropora brueggemanni	Acropora humilis	Acropora sp.	Pocillopora eydouxi	Pocillopora sp.	Pocillopora verucosa	Plesiastrea curta	Leptastrea bottae	Leptastrea sp.	Platygyra daedalea	18	3	1	1	54	Fragment	Sterile bag	Hammer & chisel	DNS	DNS	8	DNS	8	DNS	STORED AT 0-4 DEGC, TRANSPORTED TO LAB	NA	NA	NA	STERILE BAG	Fragment	AB_DNS	AB ONLY, EXTRACT	NA	AB_DNS	NA	NA
98	Mashini AG, Yazdani MF, Mostafavi PG, Shahhosseiny MH	Analysis of symbiotic Symbiodinium in scleractinian corals off Northwest Kish Island, Persian Gulf	MARINE ECOLOGY	2017	SURVEY	Acropora arabiensis	Favites pentagona	Leptastrea transversa	Platygyra daedalea	Porites compressa	Cyphastrea microphthalma	NA	NA	NA	NA	NA	NA	NA	NA	NA	NA	NA	NA	6	5	1	1	30	Fragment	DNS	DNS	DNS	DNS	2	DNS	DNS	DNS	DNS	NA	NA	NA	NA	Fragment	PRESERVED_DMSO-20%	PRESERVED, AB_BUFFER	NA	AB_BUFFER	NA	NA
99.1	Pontasch S, Fisher PL, Krueger T et al.	Photoacclimatory and photoprotective responses to cold versus heat stress in high latitude reef corals	JOURNAL OF PHYCOLOGY	2017	EXPERIMENT	Pocillopora damicornis	Stylophora sp.	Porites heronensis	NA	NA	NA	NA	NA	NA	NA	NA	NA	NA	NA	NA	NA	NA	NA	3	3	25	1	225	Fragment	DNS	DNS	DNS	DNS	1.5	DNS	DNS	NA	NA	DNS	DNS	NA	NA	Fragment	SNAP	SNAP, FROZ_80, AB-SW	NA	AB_SW	NA	NA
99.2	Pontasch S, Fisher PL, Krueger T et al.	Photoacclimatory and photoprotective responses to cold versus heat stress in high latitude reef corals		2017	REPEAT	REPEAT	REPEAT	REPEAT	REPEAT	REPEAT	REPEAT	REPEAT	REPEAT	REPEAT	REPEAT	REPEAT	REPEAT	REPEAT	REPEAT	REPEAT	REPEAT	REPEAT	REPEAT	REPEAT	REPEAT	REPEAT	REPEAT	REPEAT	REPEAT	REPEAT	REPEAT	REPEAT	REPEAT	REPEAT	REPEAT	REPEAT	REPEAT	REPEAT	REPEAT	REPEAT	NA	NA	Fragment	AB_SW	AB, PRESERVED_DMSO	DMSO_20%	AB_SW	NA	NA
100	Scheufen T, Kramer WE, Iglesias-Prierto R, Enriquez S	Seasonal variation modulates coral sensibility to heat stress and explains annual changes in coral productivity	SCIENTIFIC REPORTS	2017	EXPERIMENT	Orbicella annularis	Orbicella faveolata	Montastrea cavernosa	Pseudodiploria strigosa	NA	NA	NA	NA	NA	NA	NA	NA	NA	NA	NA	NA	NA	NA	4	3	DNS	1	320	Fragment	DNS	DNS	DNS	DNS	DNS	5	DNS	NA	NA	DNS	DNS	NA	NA	Fragment	AB_SW	AB, HOMOG	NA	AB_SW	DISPERSER_ULeptastrea transversa TURRAX	NA
101	Silverstein RN, Cunning R, Baker AC	Tenacious D: Symbiodinium in clade D remain in reef corals at both high and low temperature extreme despite impairment	JOURNAL OF EXPERIMENTAL BIOLOGY	2017	EXPERIMENT	Montastrea cavernosa	NA	NA	NA	NA	NA	NA	NA	NA	NA	NA	NA	NA	NA	NA	NA	NA	NA	1	9	DNS	1	159	Fragment	DNS	Drill press	DNS	DNS	DNS	DNS	2.5	NA	NA	DNS	DNS	RAZOR	DNS	Tissue	PRESERVED_DNA BUFFER AND SDS_1%	PRESERVED_DNA BUFFER	DNS	NA	NA	NA
102	Smith EG, Vaughan GO, Ketchum RN, McParland D, Burt JA	Symbiont community stability through severe coral bleaching in a thermally extreme lagoon	SCIENTIFIC REPORTS	2017	SURVEY	Cyphastrea sp.	Acropora sp.	Porites sp.	Dipsastrea sp.	Platygyra sp.	Anomastrea sp.	Siderastrea sp.	Coscinaraea sp.	Stylophora sp.	Turbinaria sp.	NA	NA	NA	NA	NA	NA	NA	NA	10	DNS	DNS	1	109	Fragment	DNS	DNS	DNS	DNS	DNS	0.25	DNS	DNS	ZIPLOCK, SNAP ON BOAT	NA	NA	NA	NA	Fragment	SNAP	SNAP, FROZ_80	-80	NA	NA	NA
103	Smith EG, Hume BCC, Delaney P, Wiedenmann J, Burt JA	Genetic structure of coral-Symbiodinium symbioses on the world's warmest reefs	PLOS ONE	2017	SURVEY	Platygyra daedalea	Acropora downingi	Dipsastrea pallida	NA	NA	NA	NA	NA	NA	NA	NA	NA	NA	NA	NA	NA	NA	NA	1	87	1	1	87	Fragment	DNS	DNS	DNS	DNS	DNS	1	DNS	DNS	ZIPLOCK, DRY ICE, -80	NA	NA	NA	NA	Fragment	FROZ_80	FROZ_80	-80	NA	NA	NA
104	Tagliafico A, Rudd D, Rangel MS, Kelaher BP, Christidis L, Cowden K, Scheffers SR, Benkendorff K	Lipid-enriched diets reduce the impacts of thermal stress in corals	MARINE ECOLOGY PROGRESS SERIES	2017	EXPERIMENT	Duncanopsammia axifuga	Acropora millepora	NA	NA	NA	NA	NA	NA	NA	NA	NA	NA	NA	NA	NA	NA	NA	NA	2	7	DNS	1	72	Fragment	DNS	DNS	DNS	DNS	5	DNS	DNS	NA	NA	720	BAG_SW IN COOLER TRANSPORTED	NA	NA	Fragment	AB_CA	AB, SNAP, FROZ_80	NA	AB_CA	NA	NA
105	Tong H, Zhou G, Yuan T, Zhang W, Tian R, Huang H, Qian PY	Temperature shapes coral-algal symbiosis in the South China Sea	SCIENTIFIC REPORTS	2017	SURVEY	Galaxia fasicularis	Montipora sp.	NA	NA	NA	NA	NA	NA	NA	NA	NA	NA	NA	NA	NA	NA	NA	NA	2	24	1	1	48	Fragment	DNS	Hammer & chisel	DNS	DNS	1	DNS	1	DNS	BAG_SW, WASHED WITH sw ON BOAT, FIXED IN ETH_70, TRANSPORTED ON DRYICE TO LAB, FROZ_30	NA	NA	NA	NA	Fragment	PRESERVED_ETH_70%	PRESERVED_ETH_70, FROZ_30, GROUND_BUFFER	ETH_30	NA	MORTAR AND PESTLE	NA
106	Traylor-Knowles N, Rose NH, Sheets EA, Palumbi SR	Early transcriptional responses during heat Stress in the Coral Acropora hyacinthus	BIOLOGICAL BULLETIN	2017	EXPERIMENT	Acropora hyacinthus	NA	NA	NA	NA	NA	NA	NA	NA	NA	NA	NA	NA	NA	NA	NA	NA	NA	1	6	DNS	1	20	Fragment	DNS	DNS	DNS	DNS	DNS	DNS	DNS	NA	NA	DNS	DNS	NA	NA	Fragment	PRESERVED_RNAlater	PRESERVED_RNAlater	RNA later	NA	NA	NA
107	Zhou G, Cai L, Li Y, Tong H, Jiang L, Zhang Y, Lei X, Guo M, Liu S, Qian PY, Huang H	Temperature -driven local acclimatization of symbiodinium hosted by thr coral Galaxea fasicularis at Hainan Islans, China	FRONTIERS IN MICROBIOLOGY	2017	SURVEY	Galaxia fasicularis	NA	NA	NA	NA	NA	NA	NA	NA	NA	NA	NA	NA	NA	NA	NA	NA	NA	1	32	1	1	32	Fragment	DNS	DNS	DNS	DNS	DNS	4	DNS	DNS	DNS	NA	NA	NA	NA	Fragment	PRESERVED_ETH_95%	PRESERVED_ETH_95, FROZ_20	ETH_95	NA	NA	NA
108	Zhou Z, Wu Y, Zhang C, Li C, Chen G, Yu X, Shi X, Xu Y, Wang L, Huang B	Suppression of NF-kB signal pathway by NLRC#-like protein in stony coral Acropora aculeus under heat stress	FISH & SHELLFISH IMMUNOLOGY	2017	EXPERIMENT	Acropora aculeus	NA	NA	NA	NA	NA	NA	NA	NA	NA	NA	NA	NA	NA	NA	NA	NA	NA	1	1	DNS	DNS	DNS	Fragment	DNS	DNS	DNS	DNS	DNS	DNS	DNS	NA	NA	DNS	DNS	NA	NA	Fragment	SNAP	SNAP, GR, PRESERVED_TRIZOL, RNA EXTRACTED	TRIZOL	NA	DNS	NA
109.1	Ziegler M, Seneca FO, Yum LK, Palumbi SR, Voolstra CR	Bacterial community dynamics are linked to paterns of coral heat tolerance	NATURE COMMUNICATIONS	2017	EXPERIMENT	Acropora hyacinthus	NA	NA	NA	NA	NA	NA	NA	NA	NA	NA	NA	NA	NA	NA	NA	NA	NA	1	10	24	1	240	Fragment	DNS	DNS	DNS	DNS	DNS	DNS	DNS	NA	NA	DNS	DNS	NA	NA	Fragment	PRESERVED_ETH_100%	PRESERVED_ETH_100%	ETH_100%	NA	NA	NA
109.2	Ziegler M, Seneca FO, Yum LK, Palumbi SR, Voolstra CR	Bacterial community dynamics are linked to paterns of coral heat tolerance		2017	REPEAT	REPEAT	REPEAT	REPEAT	REPEAT	REPEAT	REPEAT	REPEAT	REPEAT	REPEAT	REPEAT	REPEAT	REPEAT	REPEAT	REPEAT	REPEAT	REPEAT	REPEAT	REPEAT	REPEAT	REPEAT	REPEAT	REPEAT	REPEAT	REPEAT	REPEAT	REPEAT	REPEAT	REPEAT	REPEAT	REPEAT	REPEAT	REPEAT	REPEAT	REPEAT	REPEAT	NA	NA	Fragment	PRESERVED_RNAfixing solution	PRESERVED_RNAfixing sol, FROZE_80, DEFROSTED, BEADS, PRESERVED_TRIZOL, RNA EXTRACTED	RNA later	NA	BEAD	NA
110.1	Amid C, Olstedt M, Gunnarsson JS, Le Lan H, Tran Thi Minh H, Van den Brink PJ, Hellström M, Tedengren M	Additive effects of the herbicide glyphosate and elevated temperature on the branched coral Acropora formosa in Nha Trang, Vietnam	ENVIRONMENTAL SCIENCE & POLLUTION RESEARCH	2018	EXPERIMENT	Acropora muricata	NA	NA	NA	NA	NA	NA	NA	NA	NA	NA	NA	NA	NA	NA	NA	NA	NA	1	1	70	1	70	Fragment	DNS	Pliers	DNS	DNS	8.5	DNS	DNS	NA	NA	30	FALCON TUBE SW, IN COOLER,	blasted tissue sample off using SW in a syringe	DNS	Fragment	AB_SW	AB, VARIOUS METHODS	NA	AB_SW	NA	NA
110.2	Amid C, Olstedt M, Gunnarsson JS, Le Lan H, Tran Thi Minh H, Van den Brink PJ, Hellström M, Tedengren M	Additive effects of the herbicide glyphosate and elevated temperature on the branched coral Acropora formosa in Nha Trang, Vietnam		2018	REPEAT	REPEAT	REPEAT	REPEAT	REPEAT	REPEAT	REPEAT	REPEAT	REPEAT	REPEAT	REPEAT	REPEAT	REPEAT	REPEAT	REPEAT	REPEAT	REPEAT	REPEAT	REPEAT	REPEAT	REPEAT	REPEAT	REPEAT	REPEAT	REPEAT	REPEAT	REPEAT	REPEAT	REPEAT	REPEAT	REPEAT	REPEAT	REPEAT	REPEAT	REPEAT	REPEAT	DNS	DNS	Fragment	PRESERVED_ETH_70%	PRESERVED_ETH_70, DNA EXTRACTED	ETH_70%	NA	NA	NA
111	Baker DM, Freeman CJ, Wong JCY, Fogel ML, Knowlton N	Climate change promotes parasitism in a coral symbiosis	ISME JOURNAL	2018	EXPERIMENT	Orbicella faveolata	NA	NA	NA	NA	NA	NA	NA	NA	NA	NA	NA	NA	NA	NA	NA	NA	NA	1	20	3	1	60	Fragment	DNS	Hammer & chisel	DNS	DNS	DNS	4	DNS	NA	NA	DNS	BUCK_SW	NA	NA	Fragment	FROZ_unknown	FROZEN OVERNIGHT, AB_DI, HOMOG	NA	AB_DI	NOT SPECIFIED_"TISSUE HOMOGENIZER"	NA
112	Barshis DJ, Birkeland C, Toonen RJ, Gates RD, Stillman JH	High-frequency temperature variability mirrors fixed differences in thermal limits 2 of the massive coral Porites lobata (Dana, 1846)	JOURNAL OF EXPERIMENTAL BIOLOGY	2018	EXPERIMENT	Porites lobata	NA	NA	NA	NA	NA	NA	NA	NA	NA	NA	NA	NA	NA	NA	NA	NA	NA	1	5	30	1	150	Fragment	DNS	Pneumatic Drill	DNS	125	DNS	DNS	1.9	NA	NA	DNS	CORES WRAPPED IN WET PAPER TOWELS IN PLASTIC BAG WITH MINIMAL AMOUNT OF SW, AND SHIPPED IN COOLERS LIVE	NA	NA	Fragment	SNAP	SNAP, FROZ_80, TISSUE REMOVED WITH PLIERS, GROUND, FROZ_80	NA	NA	LYER_QIGEN TISSUE LYSER	NA
113	Baumann JH, Davies SW, Aichelman HE, Castillo KD	Coral Symbiodinium community composition across the Belize Mesoamerican Barrier Reef System is influenced by host species and thermal variability\	MICROBIAL ECOLOGY	2018	SURVEY	Siderastrea siderea	Siderastrea radians	Pseudodiploria strigosa	NA	NA	NA	NA	NA	NA	NA	NA	NA	NA	NA	NA	NA	NA	NA	3	52.5	1	1	134	Fragment	DNS	DNS	DNS	DNS	DNS	DNS	0.2	DNS	ON ICE, TRANSPORT TO LAND, ETH_96, FROZ_20, ONE ICE FLIGHT TO LAB	NA	NA	NA	NA	Fragment	PRESERVED_ETH_96%	PRESERVED_ETH_96, FROZ_20	ETH_96	NA	NA	NA
114	Chase TJ, Pratchett MS, Frank GE, Hoogenboom MO	Coral-dwelling fish moderate bleaching susceptibility of coral hosts	PLOS ONE	2018	EXPERIMENT	Pocillopora damicornis	NA	NA	NA	NA	NA	NA	NA	NA	NA	NA	NA	NA	NA	NA	NA	NA	NA	1	9	1	1	9	Fragment	DNS	DNS	DNS	DNS	6	DNS	DNS	NA	NA	DNS	DNS	NA	NA	Fragment	SNAP	SNAP, FROZ_80, AB_SW, HOMOG	NA	AB_SW	DNS	NA
115	Davies SW, Ries JB, Marchetti A, Castillo KD	Symbiodinium Functional Diversity in the Coral Siderastrea siderea Is Influenced by Thermal Stress and Reef Environment, but Not Ocean Acidification	FRONTIERS IN MARINE SCIENCE	2018	EXPERIMENT	Siderastrea siderea	NA	NA	NA	NA	NA	NA	NA	NA	NA	NA	NA	NA	NA	NA	NA	NA	NA	1	12	18	1	216	Fragment	DNS	Hammer & chisel	DNS	DNS	DNS	DNS	DNS	NA	NA	DNS	DNS	NA	NA	Fragment	WP_DNS	AB, PRESERVED_RNAlater, FROZ_80, RNA EXTRACTED	RNA LATER	WP	NA	NA
116	Franzelitti S, Airi V, Calbucci D, Carolselli E, Prada F, Voolstra CR, Mass T, Falini G, Fabbri E, Goffredo S	Transcriptional response of the heat shock gene hsp70 aligns with differences in stress susceptibility of shallow-water corals from the Mediterranean Sea	MARINE ENVIRONMENTAL RESEARCH	2018	EXPERIMENT	Cladocora caespitosa	Balanophyllia europaea	Astroides calycularis	Caryophyllia inornata	Leptopsammia pruvoti	NA	NA	NA	NA	NA	NA	NA	NA	NA	NA	NA	NA	NA	5	6	10	1	300	Fragment	DNS	DNS	DNS	DNS	DNS	DNS	DNS	NA	NA	DNS	DNS	NA	NA	Fragment	PRESERVED_RNAlater	PRESERVED_RNAlater_FROZ_80, HOMOG_TRI REAGENT, RNA EXTRACTED	RNA LATER	NA	DNS	NA
117	Hillyer KE, Dias D, Lutz A, Roessner U, Davy SK	13C metabolomics reveals widespread change in carbon fate during coral bleaching	METABOLOMICS	2018	EXPERIMENT	Acropora aspera	NA	NA	NA	NA	NA	NA	NA	NA	NA	NA	NA	NA	NA	NA	NA	NA	NA	1	6	11	1	66	Fragment	DNS	DNS	DNS	DNS	8	DNS	DNS	NA	NA	DNS	DNS	NA	NA	Fragment	SNAP	SNAP, FROZ_80, DEFROST, AB_DI, HOMOG	NA	AB_DI	SAW TOOTHED HOMOGENIZER	NA
118.1	Hou J, Xu T, Su D, Wu Y, Cheng L, Wang J, Zhou Z, Wang Y	RNA-Seq reveals extensive transcriptional response to heat stress in the stony coral Galaxea fascicularis	FRONTIERS IN GENETICS	2018	EXPERIMENT	Galaxia fasicularis	NA	NA	NA	NA	NA	NA	NA	NA	NA	NA	NA	NA	NA	NA	NA	NA	NA	1	4	12	1	48	Fragment	DNS	DNS	DNS	DNS	DNS	25	DNS	NA	NA	DNS	DNS	NA	NA	Fragment	SNAP	SNAP, TRIZOL, RNA EXTRACTED	TRIZOL REAGENT	NA	NA	NA
118.2	Hou J, Xu T, Su D, Wu Y, Cheng L, Wang J, Zhou Z, Wang Y	RNA-Seq reveals extensive transcriptional response to heat stress in the stony coral Galaxea fascicularis		2018	REPEAT	REPEAT	REPEAT	REPEAT	REPEAT	REPEAT	REPEAT	REPEAT	REPEAT	REPEAT	REPEAT	REPEAT	REPEAT	REPEAT	REPEAT	REPEAT	REPEAT	REPEAT	REPEAT	REPEAT	REPEAT	REPEAT	REPEAT	REPEAT	REPEAT	REPEAT	REPEAT	REPEAT	REPEAT	REPEAT	REPEAT	REPEAT	REPEAT	REPEAT	REPEAT	REPEAT	NA	NA	Fragment	DECALCIFIED	DECALC, HOMOG_LYSIS	NA	NA	DNS	NA
119	Kenkel CD, Bay LK	Exploring mechanisms that affect coral cooperation: symbiont transmission mode, cell density and community composition	PEERJ	2018	EXPERIMENT	Galaxia acrhelia	Galaxia astreata	Acropora millepora	Montipora aequituberculata	Goniopora columna	Porites lobata	NA	NA	NA	NA	NA	NA	NA	NA	NA	NA	NA	NA	6	10	6	1	360	Fragment	DNS	DNS	DNS	DNS	DNS	DNS	3.33333	NA	NA	DNS	DNS	NA	NA	Fragment	SNAP	SNAP, AB_DNS, HOMOG	VAR	NA	ELECTRIC	60
120	Krueger T, Bodin J, Horwitz N, Loussert-Fonta C, Sakr A, Escrig S, Fine M, Meibom A	Temperature and feeding induce tissue level changes in autotrophic and heterotrophic nutrient allocation in the coral symbiosis - A NanoSIMS study	SCIENTIFIC REPORTS	2018	EXPERIMENT	Stylophora pistillata	NA	NA	NA	NA	NA	NA	NA	NA	NA	NA	NA	NA	NA	NA	NA	NA	NA	1	3	6	1	18	Fragment	DNS	DNS	DNS	DNS	6	DNS	DNS	NA	NA	DNS	DNS	NA	NA	Fragment	FIXED_SOLUTION (GLUT_2.5% & FORMALDEHYDE_0.5%)	FIXED, RT, 4DEGC, DECALC, CUT, POSTFIXED, DEHYDRATED, EMBEDDED,	2.5% [v/v] glutaraldehyde, 0.5% [v/v] formaldehyde in 0.22 µm filtered 0.1 M phosphate buffer with 0.6 M sucrose, pH 7.4–7.6	NA	NA	NA
121	Mies M, Guth AZ, Tenorio AA, Banha TNS, Waters IG, Polito PS, Taniguchi S, Bicego MC, Sumida PYG	In situ shifts in predominance between autotrophic and heterotrophic feeding in the reef-building coral Mussismilia hispidia: an approach using fatty acid trophic markers	CORAL REEFS	2018	SURVEY	Mussismilia hispida	NA	NA	NA	NA	NA	NA	NA	NA	NA	NA	NA	NA	NA	NA	NA	NA	NA	1	18	1	11	198	Fragment	DNS	Chisel	DNS	DNS	DNS	DNS	DNS	DNS	PLASTIC BAG, REFRIGERATED	NA	NA	NA	NA	Fragment	GR	GROUND	NA	NA	DNS	NA
122	Oszalp HB, Caroselli E, Raimondi F, Goffredo S	Skeletal growth, morphology and skeletal parameters of a temperate, solitary and zooxanthellate coral along a depth gradient in the Dardanelles (Turkey)	CORAL REEFS	2018	SURVEY	Balanophyllia europaea	NA	NA	NA	NA	NA	NA	NA	NA	NA	NA	NA	NA	NA	NA	NA	NA	NA	1	30	1	1	30	Fragment	DNS	DNS	DNS	DNS	DNS	DNS	DNS	DNS	DNS	NA	NA	NA	NA	Fragment	BLEACH	BLEACH, OVEN DRIED	NA	NA	NA	NA
123	Palmer CV	Warmer water affects immunity of a tolerant reef coral	FRONTIERS IN MARINE SCIENCE	2018	EXPERIMENT	Porites cylindrica	NA	NA	NA	NA	NA	NA	NA	NA	NA	NA	NA	NA	NA	NA	NA	NA	NA	1	3	60	1	180	Fragment	DNS	DNS	DNS	50	DNS	DNS	DNS	NA	NA	DNS	DNS	NA	NA	Fragment	AB_BUFFER	AB, SNAP, FROZ_30, DEFROST, HOMOG	NA	AB_BUFFER	BEADS	60
124	Parkinson JE, Bartels E, Devlin-Durante MK, Lustic C, Nedimyer K, Schopmeyer S, Lirman D, LaJeunesse TC, Baums IB	Extensive transcriptional variation poses a challenge to thermal stress biomarker development for endangered corals	MOLECULAR ECOLOGY	2018	EXPERIMENT	Acropora cervicornis	NA	NA	NA	NA	NA	NA	NA	NA	NA	NA	NA	NA	NA	NA	NA	NA	NA	1	31	1	1	37	Fragment	DNS	DNS	DNS	DNS	3	DNS	DNS	NA	NA	DNS	DNS	NA	NA	Fragment	PRESERVED_RNAlater	PRESERVED_RNA_LATER	RNAlater	NA	NA	NA
125	Petrou K, Nielsen DA, Heraud P	Single-Cell Biomolecular Analysis of Coral Algal Symbionts Reveals Opposing Metabolic Responses to Heat Stress and Expulsion	FRONTIERS IN MARINE SCIENCE	2018	EXPERIMENT	Acropora millepora	NA	NA	NA	NA	NA	NA	NA	NA	NA	NA	NA	NA	NA	NA	NA	NA	NA	1	3	2	1	6	Fragment	DNS	DNS FOR FRAG, OTHER FOR SAMPliersE	DNS	DNS	DNS	DNS	10	NA	NA	DNS	DNS	PLACING FRAG IN TUBE, AND BANGING IT ON A TABLE	DNS	Symbiodiniaceae cells	AB_SW	AB_SW, SNAP, HOMOG	NA	AB_SW	DNS	NA
126	Petrou K, Nielsen DA, Heraud P	Single-Cell Biomolecular Analysis of Coral Algal Symbionts Reveals Opposing Metabolic Responses to Heat Stress and Expulsion		2018	EXPERIMENT	Acropora millepora	NA	NA	NA	NA	NA	NA	NA	NA	NA	NA	NA	NA	NA	NA	NA	NA	NA	1	3	2	1	6	Fragment	DNS	DNS	DNS	DNS	DNS	DNS	10	NA	NA	DNS	DNS	NA	NA	Fragment	SNAP	SNAP, AB_CA	NA	AB_CA	NA	NA
127	Pratte ZA, Richardson LL	Microbiome dynamics of two differentially resilient corals	DISEASES OF AQUATIC ORGANISMS	2018	EXPERIMENT	Diploria labyrinthiformis	Pseudodiploria strigosa	NA	NA	NA	NA	NA	NA	NA	NA	NA	NA	NA	NA	NA	NA	NA	NA	2	1	3	3	18	Fragment	DNS	Hammer & chisel	DNS	DNS	DNS	3	DNS	NA	NA	DNS	WHILRPAK?	NA	NA	Fragment	PRESERVED_RNAlater	PRESERVED_RNAlater, FROZ_80, DEFROST, BEAD, DNA EXTRACTED	RNA later	NA	BEAD	NA
128	Pratte ZA, Richardson LL	Microbiome dynamics of two differentially resilient corals		2018	SURVEY	Diploria labyrinthiformis	Pseudodiploria strigosa	NA	NA	NA	NA	NA	NA	NA	NA	NA	NA	NA	NA	NA	NA	NA	NA	2	1	3	3	18	Fragment	DNS	Hammer & chisel	DNS	DNS	DNS	1	DNS	DNS	INTO WHIRLPAK UNDER WATER, RNA LATER ON BOAT, DRY ICE, TRANSPORTED TO LAB, FROZ_80	NA	NA	NA	NA	Fragment	PRESERVED_RNAlater	PRESERVED_RNAlater, FROZ_80, DEFROST, BEAD, DNA EXTRACTED	RNA later	NA	BEAD	NA
129	Rubio-Portillo E, Gago JF, Martinez-Garcia M, Vezzulli L, Rosello-Mora R, Anton J, Ramos-Espla AA	Vibrio communities in scleractinian corals differ according to health status and geographic ocation in the Mediterranean Sea	SYSTEMATIC AND APPLIED MICROBIOLOGY	2018	SURVEY	Oculina patagonica	Cladocora caespitosa	NA	NA	NA	NA	NA	NA	NA	NA	NA	NA	NA	NA	NA	NA	NA	NA	2	4	1	2	16	Fragment	DNS	DNS	DNS	DNS	DNS	DNS	DNS	DNS	INTO WHIRLPAK UNDERWATER, TRANSPORTED IN COOLER TO LAB, WASHED, GR	NA	NA	NA	dns	Fragment	GR	GROUND	NA	NA	MORTAR AND PESTLE	NA
130	Shore-Maggio A, Callahan SM, Aeby GS	Trade-offs in disease and bleaching susceptibility among two color morphs of the Hawaiian reef coral, montipora capitata	CORAL REEFS	2018	EXPERIMENT	Montipora capitata	NA	NA	NA	NA	NA	NA	NA	NA	NA	NA	NA	NA	NA	NA	NA	NA	NA	1	20	2	1	40	Fragment	DNS	DNS	DNS	DNS	DNS	DNS	DNS	NA	NA	DNS	DNS	NA	DNS	Fragment	FIXED_FORMALIN_10%	FIXED, DECALC, HOMOG	NA	NA	DNS	NA
131	Van de Water JAJM	Antimicrobial and stress responses to increased temperature and bacterial pathogen challenge in the holobiont of a reef-building coral	MOLECULAR ECOLOGY	2018	EXPERIMENT	Montipora aequituberculata	NA	NA	NA	NA	NA	NA	NA	NA	NA	NA	NA	NA	NA	NA	NA	NA	NA	1	15	1	1	15	Fragment	DNS	Bone cutters	DNS	DNS	7	DNS	DNS	NA	NA	DNS	DNS	NA	NA	Fragment	SNAP	SNAP, FROZ_80 OR PARAFROMALD	PFORM_4% AND EDTA-SDS-PROTEINASEk	NA	NA	NA
132	Wall CB, Ricci CA, Foulds GE, Mydlarz LD, Gates RD, Putnam HM	The effects of environmental history and thermal stress on coral physiology and immunity	MARINE BIOLOGY	2018	EXPERIMENT	Montipora capitata	NA	NA	NA	NA	NA	NA	NA	NA	NA	NA	NA	NA	NA	NA	NA	NA	NA	1	100	1	1	100	Fragment	DNS	DNS	DNS	DNS	4	DNS	DNS	NA	NA	DNS	IN SW	NA	NA	Fragment	SNAP	SNAP, FROZ_80	NA	NA	NA	NA
133	Wang X, Deng W, Liu X, Wei G, Chen X, Zhao JX, Cai G, Zeng T	Super instrumental El Nino events recorded by a Porites coral from the South China Sea	CORAL REEFS	2018	SURVEY	Porites sp.	NA	NA	NA	NA	NA	NA	NA	NA	NA	NA	NA	NA	NA	NA	NA	NA	NA	1	1	1	1	1	Skeletal core	DNS	Drill	DNS	200	NA	NA	8	DNS	DNS	NA	NA	NA	NA	Skeletal core	DNS_CORES CUT	CUT/SLICED, BLEACHED, RINSED	NA	NA	NA	NA
134	Wang L, Shantz AA, Payet JP, Sharpton TJ, Foster A, Burkepile DE, Vega Thurber R	Corals and their microbiomes are differentially affected by exposure to elevated nutrients and a natural thermal anomaly	FRONTIERS IN MARINE SCIENCE	2018	SURVEY	Agaricia sp.	Siderastrea siderea	NA	NA	NA	NA	NA	NA	NA	NA	NA	NA	NA	NA	NA	NA	NA	NA	2	20	1	1	40	Mucus	Sterile	Syringes	DNS	DNS	NA	NA	NA	DNS	SYRINGE SAMPLE TRANSFERED TO TUBE, "FROZEN ON DRY ICE", FROZ_80, RNA EXTRACTED	NA	NA	SAME	ster	Mucus	FROZ_80	FROZ_80, DEFROSTED, FILT, DNA EXTRACTED	NA	NA	NA	NA
135	Wu CC, Shen CC, Lo L, Hsin YC, Yu K et al	Pinatubo volcanic eruption exacerbated an abrupt coral mortality event in 1991 summer	GEOPHYSICAL RESEARCH LETTERS	2018	SURVEY	Porites sp.	NA	NA	NA	NA	NA	NA	NA	NA	NA	NA	NA	NA	NA	NA	NA	NA	NA	1	2	1	1	2	Skeletal core	DNS	DNS	DNS	DNS	DNS	DNS	DNS	DNS	DNS	NA	NA	NA	NA	Skeletal core	DNS_CORES CUT	CUT/SLICED, MILLED, BLEACHED, CLEANED, CORE STUFF	NA	NA	NA	NA
136	Zhang Y, Zhou Z, Wang L, Huang B	Transcriptome, expression, and activity analyses reveal a vital heat shock protein 70 in the stress response of stony coral Pocillopora damicornis	CELL STRESS AND CHAPERONES	2018	EXPERIMENT	Pocillopora damicornis	NA	NA	NA	NA	NA	NA	NA	NA	NA	NA	NA	NA	NA	NA	NA	NA	NA	1	1	30	1	30	Fragment	DNS	DNS	DNS	DNS	DNS	DNS	DNS	NA	NA	DNS	DNS	NA	NA	Fragment	SNAP	SNAP, GR, TRIZOL, RNA EXTRACTED	TRIZOL	NA	DNS	NA
137	Beatty DS, Valayil JM, Clements CS, Ritchie KB, Stewart FJ, Hay ME	Variable effects of local management on coral defenses against a thermally regulated bleaching pathogen	SCIENCE ADVANCES	2019	SURVEY	Acropora millepora	Porites cylindrica	Pocillopora damicornis	NA	NA	NA	NA	NA	NA	NA	NA	NA	NA	NA	NA	NA	NA	NA	3	10	1	1	30	Mucus	DNS	Hammer & chisel	DNS	DNS	NA	NA	NA	DNS	DNS	NA	NA	collected frag with HAC, placed in glass jar, and shook until mucus and antibacterial compounds were released.	ETHANOL CLEANED	Mucus	PRESERVED_RNAlater	PRESERVED_RNAlater, FROZ_20, DNA EXTRACTED	NA	NA	NA	NA
138	Carballo-Bolanos R, Denis V, Huang YY, Keshavmurthy S, Chen CA	Temporal variation and photochemical efficiency of species in Symbiodinaceae associated with coral Leptoria phrygia (Scleractinia; Merulinidae) exposed to contrasting temperature regimes	PLOS ONE	2019	SURVEY	Leptoria phrygia	NA	NA	NA	NA	NA	NA	NA	NA	NA	NA	NA	NA	NA	NA	NA	NA	NA	1	25	5	3	375	Fragment	DNS	Pneumatic Drill	DNS	DNS	DNS	DNS	2.8	DNS	COOLER SW	NA	NA	NA	NA	Fragment	SNAP	SNAP, FROZ_80, DEFROST, CUT	NA	NA	NA	NA
139	Da-Anoy JP, Cabaitan C, Conaco C	Species variability in the response to elevated temperature of select corals in north-western Philippines	JOURNAL OF THE MARINE BIOLOGICAL ASSOCIATION OF THE UNITED KINGDOM	2019	EXPERIMENT	Acropora digitifera	Acropora millepora	Acropora tenuis	Favites colemani	Montipora digitata	Seriatopora caliendrum	NA	NA	NA	NA	NA	NA	NA	NA	NA	NA	NA	NA	6	3	75	1	1350	Fragment	DNS	DNS	DNS	DNS	3.75	DNS	DNS	NA	NA	DNS	DNS	NA	NA	Fragment	BLEACH	BLEACH (SOAKED IN NAOH 1 HR (HOT SHOT METHOD)	NA	NA	NA	NA
140	Dziedzic KE, Elder H, Tavalire H, Meyer E	Heritable variation in bleaching responses and its functional genomic basis in reef‐building corals (Orbicella faveolata)	MOLECULAR ECOLOGY	2019	EXPERIMENT	Orbicella faveolata	NA	NA	NA	NA	NA	NA	NA	NA	NA	NA	NA	NA	NA	NA	NA	NA	NA	1	43	9	1	387	Fragment	DNS	DNS	DNS	DNS	DNS	DNS	DNS	NA	NA	DNS	DNS	NA	NA	Fragment	PRESERVED_RNAlater	PRESERVED_RNAlater	RNA later	NA	NA	NA
141	Goyen S, Camp EF, Fujise L, Lloyd A, et al	Mass coral bleaching of P. versipora in Sydney Harbour driven by the 2015–2016 heatwave	CORAL REEFS	2019	SURVEY	Plesiastrea versipora	Coscinaraea mcnelli	NA	NA	NA	NA	NA	NA	NA	NA	NA	NA	NA	NA	NA	NA	NA	NA	2	10	DNS	3	70	Fragment	DNS	Hammer & chisel	DNS	DNS	DNS	2	DNS	DNS	FALCON TUBES SW, ON SURFACE SNAP	NA	NA	NA	NA	Fragment	SNAP	SNAP, FROZ_80, AB_BUFFER, HOMOG	NA	AB_BUFFER	SYRINGE	NA
142	Hadjioannou L, Jimenez C, Rottier C, Sfenthourakis S, Ferrier-Pages C	Response of the temperate scleractinian coral Cladocora caespitosa to high temperature and long-term nutrient enrichment	SCIENTIFIC REPORTS	2019	EXPERIMENT	Cladocora caespitosa	NA	NA	NA	NA	NA	NA	NA	NA	NA	NA	NA	NA	NA	NA	NA	NA	NA	1	36	7	1	252	Fragment	DNS	DNS	DNS	DNS	DNS	DNS	DNS	NA	NA	DNS	BAG_SW	NA	NA	Fragment	AB_SW	AB, HOMOG	NA	AB_SW	POTTER ELVEHJEM	NA
143	Hoadley KD, Lewis AM, Wham DC, Pettay DT, Grasso C, Smith R, Kemp DW, LaJeunesse TC, Warner ME	Host–symbiont combinations dictate the photo-physiological response of reef-building corals to thermal stress	SCIENTIFIC REPORTS	2019	EXPERIMENT	Acropora muricata	Coelastrea aspera	Pachyseris rugosa	Cyphastrea chalcidicum	NA	NA	NA	NA	NA	NA	NA	NA	NA	NA	NA	NA	NA	NA	4	8	5	1	160	Fragment	DNS	DNS	DNS	DNS	DNS	DNS	DNS	NA	NA	DNS	DNS	NA	NA	Fragment	AB_SW	AB, HOMOG	DNS buffer	AB_SW	ELECTRIC_TISSUE TEARER	NA
144	Manzello DP, Matz MV, Enochs IC, Valentino L, Carlton RD, Kolodziej G, Serrano X, Towle EK, Jankulak M	Role of host genetics and heat‐tolerant algal symbionts in sustaining populations of the endangered coral Orbicella faveolata in the Florida Keys with ocean warming	Goniopora lobataAL CHANGE BIOLOGY	2019	SURVEY	Orbicella faveolata	NA	NA	NA	NA	NA	NA	NA	NA	NA	NA	NA	NA	NA	NA	NA	NA	NA	1	200	1	1	200	Fragment	DNS	Hammer & chisel	DNS	DNS	DNS	DNS	DNS	DNS	ONE ICE	NA	NA	NA	NA	Fragment	PRESERVED_ETH_95%	PRESERVED_ETH_95	ETH_95	NA	NA	NA
145	Marangoni LFDB, Mies M, Guth AZ, Nanha TNS, Inahue A, da Silva Fonseca J, et al	Peroxynitrite Generation and Increased Heterotrophic Capacity Are Linked to the Disruption of the Coral–Dinoflagellate Symbiosis in a Scleractinian and Hydrocoral Species	MICROORGANISMS	2019	SURVEY	Mussismilia hartii	NA	NA	NA	NA	NA	NA	NA	NA	NA	NA	NA	NA	NA	NA	NA	NA	NA	2	4	1	1	8	Fragment	DNS	DNS	DNS	DNS	3	DNS	DNS	DNS	SNAP ON BOAT	NA	NA	NA	NA	Fragment	SNAP	SNAP > VARIOUS	NA	NA	NA	NA
146	Pootakham W, Mhuantong W, Yoocha T, Putchim L, et al	Heat‐induced shift in coral microbiome reveals several members of the Rhodobacteraceae family as indicator species for thermal stress in Porites lutea	MICROBIOLOGY OPEN	2019	EXPERIMENT	Porites lutea	NA	NA	NA	NA	NA	NA	NA	NA	NA	NA	NA	NA	NA	NA	NA	NA	NA	1	5	4	1	20	Fragment	DNS	DNS FOR FRAG, RAZOR FOR SAMPliersE	DNS	DNS	DNS	DNS	DNS	NA	NA	60	BUCK SW	Seriatopora caliendrumpal blade placed into sterile tube	STER TUBES	Tissue	SNAP	SNAP, DNA EXTRACTION	NA	NA	NA	NA
147.1	Sale TL, Hunter CL, Hong C, Moran AL	Morphology, lipid composition, and reproduction in growth anomalies of the reef-building coral Porites evermanni and Porites lobata	CORAL REEFS	2019	SURVEY	Porites evermanni	Porites lobata	NA	NA	NA	NA	NA	NA	NA	NA	NA	NA	NA	NA	NA	NA	NA	NA	2	9.5	2	3	152	Fragment	DNS	Hammer & chisel	DNS	DNS	DNS	25	DNS	DNS	DNS	NA	NA	NA	NA	Fragment	FIXED_Z-FIX	FIXED, DECALC, CUT, EMBEDED, SECTIONED, STAINED	FIXATIVE_1:4 Z-fix/filtered seawater	NA	NA	NA
147.2	Sale TL, Hunter CL, Hong C, Moran AL	Morphology, lipid composition, and reproduction in growth anomalies of the reef-building coral Porites evermanni and Porites lobata		2019	REPEAT	REPEAT	REPEAT	REPEAT	REPEAT	REPEAT	REPEAT	REPEAT	REPEAT	REPEAT	REPEAT	REPEAT	REPEAT	REPEAT	REPEAT	REPEAT	REPEAT	REPEAT	REPEAT	REPEAT	REPEAT	REPEAT	REPEAT	REPEAT	REPEAT	REPEAT	REPEAT	REPEAT	REPEAT	REPEAT	REPEAT	REPEAT	REPEAT	REPEAT	REPEAT	REPEAT	NA	NA	Fragment	SNAP	SNAP, FROZ_80,	DNS	NA	NA	NA
147.3	Sale TL, Hunter CL, Hong C, Moran AL	Morphology, lipid composition, and reproduction in growth anomalies of the reef-building coral Porites evermanni and Porites lobata		2019	REPEAT	REPEAT	REPEAT	REPEAT	REPEAT	REPEAT	REPEAT	REPEAT	REPEAT	REPEAT	REPEAT	REPEAT	REPEAT	REPEAT	REPEAT	REPEAT	REPEAT	REPEAT	REPEAT	REPEAT	REPEAT	REPEAT	REPEAT	REPEAT	REPEAT	REPEAT	REPEAT	REPEAT	REPEAT	REPEAT	REPEAT	REPEAT	REPEAT	REPEAT	REPEAT	REPEAT	NA	NA	Fragment	BLEACH	BLEACH, RINSE, AIR DRY	NA	NA	NA	NA
148	Wang JT, Wang YT, Keshavmurthy S, Meng PJ, Chen CA	The coral Platygyra verweyi exhibits local adaptation to longterm thermal stress through host-specifc physiological and enzymatic response	SCIENTIFIC REPORTS	2019	SURVEY	Platygyra verucosa	NA	NA	NA	NA	NA	NA	NA	NA	NA	NA	NA	NA	NA	NA	NA	NA	NA	1	DNS	DNS	DNS	12	Fragment	DNS	DNS	DNS	DNS	DNS	DNS	DNS	DNS	DNS	NA	NA	NA	NA	Fragment	AB_SW	AB, HOMOG	30–80% saturation of ammonium sulfate, re-suspending in 3.2 M (NH4)2SO4 con- taining 80 mM phosphate buffer (pH 7.5) and 0.1 M EDTA	AB_SW	GLASS	NA
149	Wright RM, Mera H, Kenkel CD, Nayfa M, Bay LK, Matz MV	Positive genetic associations among fitness traits suPorites poritest evolvability of a reef‐building coral under multiple stressors	Goniopora lobataAL CHANGE BIOLOGY	2019	EXPERIMENT	Acropora millepora	NA	NA	NA	NA	NA	NA	NA	NA	NA	NA	NA	NA	NA	NA	NA	NA	NA	1	DNS	25	1	1000	Fragment	DNS	DNS	DNS	DNS	DNS	DNS	DNS	NA	NA	DNS	DNS	NA	NA	Fragment	SNAP	SNAP, FROZ_80, AB_SW, HOMOG	NA	AB_SW	ELECTRIC_PRO250 HOMOGENIZER	60
150	Wu Y, Zhou JW, Luo J, Wang L, Zhang Y	Temperature regulates the recognition activities of a galectin to pathogen and symbiont in the scleractinian coral Pocillopora damicornis	DEVELOPMENTAL AND COMPARATIVE IMMUNOLOGY	2019	EXPERIMENT	Pocillopora damicornis	NA	NA	NA	NA	NA	NA	NA	NA	NA	NA	NA	NA	NA	NA	NA	NA	NA	1	DNS	DNS	DNS	DNS	Fragment	DNS	DNS	DNS	DNS	DNS	DNS	DNS	NA	NA	DNS	DNS	NA	NA	Fragment	SNAP	SNAP, GR_TRIZOL, RNA EXTRACTED	TRIZOL	NA	DNS	NA
151	Conti-Jerpe IE, Thompson PD, Wong CWM, Oliveira NL, Duprey NN, Moynihan MA, Baker DM	Trophic strategy and bleaching resistance in reef building corals	SCIENCE ADVANCES	2020	SURVEY	Acropora samoensis	Acropora pruinosa	Favites abdita	Goniopora lobata	Pavona decussata	Turbinaria peltata	Porites lobata	Platygyra carnosus	NA	NA	NA	NA	NA	NA	NA	NA	NA	NA	8	2			287	Fragment	Sterile bag	Hammer & chisel	DNS	DNS	6	DNS	DNS	DNS	WHIRLPAK ON ICE, NO SW	NA	NA	NA	NA	Fragment	FROZ_20	FROZ_20, AB_DI, HOMOG	NA	AB_DI	ELECTRIC_TISSUE TEARER	NA
152	Cunning R, Baker AC	Thermotolerant coral symbionts modulate heat stress-responsive genes in their hosts	MOLECULAR ECOLOGY	2020	EXPERIMENT	Montastrea cavernosa	NA	NA	NA	NA	NA	NA	NA	NA	NA	NA	NA	NA	NA	NA	NA	NA	NA	1	9	DNS	1	36	Fragment	DNS	Drill press	DNS	DNS	DNS	DNS	2.5	NA	NA	DNS	DNS	RAZOR	NA	Tissue	SNAP	SNAP, FROZ_80, HOMOG	NA	NA	RAZOR ON TISSUE	NA
153	Howells EJ, Vaughan GO, Work TM, Burt JA, Abrego D	Annual outbreaks of coral disease coincide with extreme seasonal warming	CORAL REEFS	2020	SURVEY	Acropora downingi	NA	NA	NA	NA	NA	NA	NA	NA	NA	NA	NA	NA	NA	NA	NA	NA	NA	1	10	1	1	10	Fragment	DNS	DNS	DNS	DNS	DNS	DNS	DNS	DNS	DNS	NA	NA	NA	NA	Fragment	FIXED_PARAFORMALDEHYDE_4%	FIXED, BUFFERED, (decalc?) 4DEGC, STAINED	DNS	NA	NA	NA
154	Hume BCC, Mejia-Restrepo A, Voolstra CR, Berumen ML	Fine-Seriatopora caliendrume delineation of Symbiodiniaceae genotypes on a previously bleached central Red Sea reef system demonstrates a prevalence of coral host-specific associations	CORAL REEFS	2020	SURVEY	Pocillopora verucosa	Stylophora pistillata	Seriatopora hystrix	Gardineroseris planulata	Galaxia fasicularis	Porites sp.	NA	NA	NA	NA	NA	NA	NA	NA	NA	NA	NA	NA	6	DNS	DNS	DNS	DNS	Fragment	DNS	Hammer & chisel	DNS	DNS	DNS	DNS	DNS	DNS	BUCK_SW	NA	NA	NA	NA	Fragment	PRESERVED_ETH_96%	PRESERVED_ETH_96, GR, HOMOG, RNA EXTRACTED	ETH_96%	NA	BEADS	NA
155	Jurriaans S, Hoogenboom MO	Seasonal acclimation of thermal performance in two species of reef-building corals	MARINE ECOLOGY PROGRESS SERIES	2020	EXPERIMENT	Acropora valenciennesi	Porites cylindrica	NA	NA	NA	NA	NA	NA	NA	NA	NA	NA	NA	NA	NA	NA	NA	NA	2	16	5	1	160	Fragment	DNS	DNS	DNS	DNS	DNS	DNS	8	NA	NA	DNS	DNS	NA	NA	Fragment	FROZ_80	FROZ_80, AB_SW, HOMOG	NA	AB_SW	DISPERSER_ULeptastrea transversa TURRAX	NA
156	Kavousi J, Denis V, Sharp V, Reimer JD, Nakamura T, Parkinson JE	Unique combinations of coral host and algal symbiont genotypes reflect intraspecific variation in heat stress responses among colonies of the reef-building coral, Montipora digitata	MARINE BIOLOGY	2020	EXPERIMENT	Montipora digitata	NA	NA	NA	NA	NA	NA	NA	NA	NA	NA	NA	NA	NA	NA	NA	NA	NA	1	16	10	1	160	Fragment	DNS	DNS	DNS	50	3.5	DNS	DNS	NA	NA	DNS	DNS	NA	NA	Fragment	PRESERVED_ETH_DNS	PRESERVED_ETH_DNS	ETH_DNS	NA	NA	NA
157	Osman EO, Suggett DJ, Voolstra CR, Pettay DT, Clark DR, Pogoreutz C, Sampayo EM, Warner ME, Smith DJ	Coral microbiome composition along the northern Red Sea suggests high plasticity of bacterial and specificity of endosymbiotic dinoflagellate communities	MICROBIOME	2020	SURVEY	Porites nodifera	Dipsastrea favus	Pocillopora damicornis	Seriatopora hystrix	NA	NA	NA	NA	NA	NA	NA	NA	NA	NA	NA	NA	NA	NA	6	6	1	1	164	Fragment	DNS	DNS	DNS	DNS	1	DNS	DNS	120	BAG_SW, SHADED COLD BOX	NA	NA	NA	NA	Fragment	PRESERVED_DMSO-20%	PRESERVED_DMSO, 4DEGc, FROZ_20	DMSO 20% buffer	NA	NA	NA
158	Osman EO, Suggett DJ, Voolstra CR, Pettay DT, Clark DR, Pogoreutz C, Sampayo EM, Warner ME, Smith DJ	Coral microbiome composition along the northern Red Sea suggests high plasticity of bacterial and specificity of endosymbiotic dinoflagellate communities		2020	SURVEY	Porites nodifera	Dipsastrea favus	Pocillopora damicornis	Seriatopora hystrix	NA	NA	NA	NA	NA	NA	NA	NA	NA	NA	NA	NA	NA	NA	6	DNS	DNS	1	141	Mucus	Sterile	Syringes	DNS	DNS	NA	NA	NA	120	BAG_SW, SHADED COLD BOX	NA	NA	sterile 50 ml syringe for mucus	STER	Mucus	PRESERVED_DMSO-20%	PRESERVED_DMSO, 4DEGc, FROZ_20	DMSO 20% buffer	NA	NA	NA
159	Patel NP, Shimpi GG, Haldar S	Evaluation of heterotrophic bacteria associated with healthy and bleached corals of Gulf of Kutch, Gujarat, India for siderophore production and their response to climate change factors	ECOLOGICAL INDICATORS	2020	SURVEY	Porites sp.	Turbinaria sp.	NA	NA	NA	NA	NA	NA	NA	NA	NA	NA	NA	NA	NA	NA	NA	NA	2	8	1	1	16	Mucus	Sterile	Cotton swab	DNS	DNS	NA	NA	NA	DNS	All samples collected from frag surface using cotton swab after washing 3 times with sterile 3% saline. After corals weree swabbed, the swabs wabs were then dipped in tube with 3% saline and transported back to the lab on ice.	NA	NA	mucus collected with sterile cotton swab	STER	Mucus	PRESERVED_DNA_LB BROTH WITH GLYCEROL	PRESERVED_LB BROTH, FROZ_80	PRESERVATIVE_3% nAcL + 25% GLYCEROL	NA	NA	NA
160	Pramneechote P, Sinutok S, Wongkamhaeng K, Chotikarn P	An assessment of the net ecosystem metabolism and respiration of a tropical coral reef	APPLIED ECOLOGY AND ENVIRONMENTAL RESEARCH	2020	SURVEY	Pocillopora acuta	NA	NA	NA	NA	NA	NA	NA	NA	NA	NA	NA	NA	NA	NA	NA	NA	NA	1	6	1	1	6	Fragment	DNS	DNS	DNS	DNS	DNS	DNS	DNS	DNS	DNS	NA	NA	NA	NA	Fragment	FROZ_unknown	FROZ_DNS, AB_SW	NA	AB_SW	NA	NA
161	Rosic N, Remond C, Mello-Athayde MA	Differential impact of heat stress on reef-building corals under different light conditions	MARINE ENVIRONMENTAL RESEARCH	2020	EXPERIMENT	Acropora millepora	Stylophora pistillata	NA	NA	NA	NA	NA	NA	NA	NA	NA	NA	NA	NA	NA	NA	NA	NA	2	6	1	1	12	Fragment	DNS	Wire cutters	DNS	DNS	7	DNS	DNS	NA	NA	DNS	DNS	NA	NA	Fragment	SNAP	SNAP, FROZ_80, AB_BUFFER	NA	AB_BUFFER	NA	NA
162.1	Sangmanee K, Casareto BE, Nguyen TD, Sangsawang L, Toyoda K, Suzuki T, Suzuki Y	Influence of thermal stress and bleaching on heterotrophic feeding of two scleractinian corals on pico-nanoplankton	MARINE POLLUTION BULLETIN	2020	EXPERIMENT	Montipora digitata	Porites lutea	NA	NA	NA	NA	NA	NA	NA	NA	NA	NA	NA	NA	NA	NA	NA	NA	2	3	3	1	18	Fragment	DNS	DNS	DNS	DNS	3	3	DNS	NA	NA	DNS	DNS	NA	NA	Fragment	WP_SW	AB, HOMOG	NA	WP_SW	GLASS	NA
162.2	Sangmanee K, Casareto BE, Nguyen TD, Sangsawang L, Toyoda K, Suzuki T, Suzuki Y	Influence of thermal stress and bleaching on heterotrophic feeding of two scleractinian corals on pico-nanoplankton		2020	REPEAT	REPEAT	REPEAT	REPEAT	REPEAT	REPEAT	REPEAT	REPEAT	REPEAT	REPEAT	REPEAT	REPEAT	REPEAT	REPEAT	REPEAT	REPEAT	REPEAT	REPEAT	REPEAT	REPEAT	REPEAT	REPEAT	REPEAT	REPEAT	REPEAT	REPEAT	REPEAT	REPEAT	REPEAT	REPEAT	REPEAT	REPEAT	REPEAT	REPEAT	REPEAT	REPEAT	NA	NA	Fragment	GR	GROUND_BUFFER	NA	NA	MORTAR AND PESTLE	NA
163.1	Schoepf V, Jung MU, McCulloch MT, White NE, Stat M, Thomas L	Thermally variable, macrotidal reef habitats promote rapid recovery from mass coral bleaching	FRONTIERS IN MARINE SCIENCE	2020	SURVEY	Acropora aspera	NA	NA	NA	NA	NA	NA	NA	NA	NA	NA	NA	NA	NA	NA	NA	NA	NA	1	7.5	VAR	1	49	Fragment	DNS	DNS	DNS	DNS	DNS	DNS	DNS	DNS	DNS	NA	NA	NA	NA	Fragment	FROZ_80	FROZ_80, AB_DNS	NA	AB_DNS	NA	NA
163.2	Schoepf V, Jung MU, McCulloch MT, White NE, Stat M, Thomas L	Thermally variable, macrotidal reef habitats promote rapid recovery from mass coral bleaching		2020	REPEAT	REPEAT	REPEAT	REPEAT	REPEAT	REPEAT	REPEAT	REPEAT	REPEAT	REPEAT	REPEAT	REPEAT	REPEAT	REPEAT	REPEAT	REPEAT	REPEAT	REPEAT	REPEAT	REPEAT	REPEAT	REPEAT	REPEAT	REPEAT	REPEAT	REPEAT	REPEAT	REPEAT	REPEAT	REPEAT	REPEAT	REPEAT	REPEAT	REPEAT	REPEAT	REPEAT	NA	NA	Fragment	DNS	DNS	NA	NA	NA	NA
164	Seveso D, Arrigoni R, Montano S, Maggiono D, et al	Investigating the heat shock protein response involved in coral bleaching across scleractinian species in the central Red Sea	CORAL REEFS	2020	SURVEY	Porites lobata	Goniopora lobata	Stylophora pistillata	Seriatopora hystrix	NA	NA	NA	NA	NA	NA	NA	NA	NA	NA	NA	NA	NA	NA	4	7	DNS	1	30	Fragment	DNS	Pliers & Metal corer	DNS	DNS	DNS	DNS	0.8	DNS	SNAP ON BOAT	NA	NA	NA	NA	Fragment	SNAP	SNAP, FROZ_80, GR, HOMOG_BUFFER	NA	NA	MORTAR	NA
165	Skutnik JE, Otieno S, Khoo SK, Strychar KB	Examining the effect of heat stress on Montastrea cavernosa (Linnaeus 1767) from a Mesophotic Coral Ecosystem (MCE)	WATER	2020	EXPERIMENT	Montastrea cavernosa	NA	NA	NA	NA	NA	NA	NA	NA	NA	NA	NA	NA	NA	NA	NA	NA	NA	1	40	10	1	400	Fragment	DNS	DNS	DNS	DNS	DNS	2.54	DNS	NA	NA	DNS	RINSED ON BOAT, CHILLED COOLER SW, TRANSPORT,	NA	NA	Fragment	SNAP	SNAP, FROZ_80, GR, FROZ_80, RNA_EXTRACTED	NA	NA	MORTAR AND PESTLE	NA
166	Sun F, Yang H, Wang G, Shi Q	Combination Analysis of Metatranscriptome and Metagenome Reveal the Composition and Functional Response of Coral Symbionts to Bleaching During an El Niño Event	FRONTIERS IN MICROBIOLOGY	2020	SURVEY	Goniastrea minuta	Pocillopora meandrina	Acropora tenuis	Pocillopora verucosa	NA	NA	NA	NA	NA	NA	NA	NA	NA	NA	NA	NA	NA	NA	4	1	3	1	12	Fragment	Sterile tubes	Hammer & chisel	DNS	DNS	1	DNS	1	DNS	CENTRIFUGE TUBES	NA	NA	NA	STERILE TUBES	Fragment	PRESERVED_DNA SAMPLE PROTECTOR	PRESERVED_DNA SAMPLE PROTECTOR	NA	NA	NA	NA
167	Tong H, Cai L, Zhou G, Zhang W, Huang H, Qian PY	Correlations between prokaryotic microbes and stress-resistant algae indifferent corals subjected to environmental stress in Hong Kong	FRONTIERS IN MICROBIOLOGY	2020	SURVEY	Montipora sp.	Porites lutea	NA	NA	NA	NA	NA	NA	NA	NA	NA	NA	NA	NA	NA	NA	NA	NA	2	24	1	1	48	Fragment	DNS	Hammer & chisel	DNS	DNS	1	DNS	1	DNS	BAGGED UNDERWATER, WASHED AT SURFACE, FIXED IN BAOT, DRYICE STORAGE DURING TRANSPORT TO LAB	NA	NA	NA	NA	Fragment	PRESERVED_ETH_70%	PRESERVED_ETH_70, FROZ_30, GR, DNA EXTRACTED	ETH_70	NA	MORTAR AND PESTLE	NA
168	van der Zande RM, Achlatis M, Bender-Champ D, Kubicek A, Dove S, Hoegh-Guldberg O	Paradise lost: End-of-century warming and acidification under business-as-usual emissions have severe consequences for symbiotic corals	Goniopora lobataAL CHANGE BIOLOGY	2020	EXPERIMENT	Acropora intermedia	Porites lobata	NA	NA	NA	NA	NA	NA	NA	NA	NA	NA	NA	NA	NA	NA	NA	NA	2	8	12	1	192	Fragment	DNS	Pneumatic Drill AND OTHER	DNS	DNS	5	DNS	0.3	NA	NA	DNS	DNS	NA	NA	Fragment	AB_SW	AB, VARIOUS METHODS	DNS	AB_SW	NA	NA
169	Voolstra CR, Buitrago-Lopez C, Perna G, Cardenas A, Hume BCC, Radecker N, Barshis DJ	Standardized short-term acute heat stress assays revolve historical differences in coral thermotolerance across microhabitat reef sites	Goniopora lobataAL CHANGE BIOLOGY	2020	EXPERIMENT	Stylophora pistillata	NA	NA	NA	NA	NA	NA	NA	NA	NA	NA	NA	NA	NA	NA	NA	NA	NA	1	14	8	1	112	Fragment	DNS	DNS	DNS	DNS	DNS	DNS	DNS	NA	NA	DNS	BAGGED UNDERWATER, COOLER SW TRANSPORT,	NA	NA	Fragment	SNAP	SNAP, FROZ_80, AB_SW, ALIQUOTTING	DNS	AB_SW	NA	NA
170	Wepfer PH, Nakajima Y, Hui FKC, Mitatai S, Economo EP	Metacommunity ecology of Symbiodiniaceae hosted by the coral Galaxea fascicularis	MARINE ECOLOGY PROGRESS SERIES	2020	SURVEY	Galaxia fasicularis	NA	NA	NA	NA	NA	NA	NA	NA	NA	NA	NA	NA	NA	NA	NA	NA	NA	1	67	1	1	67	Fragment	DNS	DNS	DNS	DNS	DNS	DNS	DNS	DNS	DNS	NA	NA	NA	NA	Fragment	DNS	DNS_NONE_DNA EXTRACTED	DNS	NA	NA	NA
171	Xu H, Feng B, Xie M, Ren Y, Xia J, Zhang Y, Wang A, Li X	Physiological characteristics and environmental adaptability of reef building corals at the Wuzhixhou Island of South China Sea	FRONTIERS IN PHYSIOLOGY	2020	SURVEY	Galaxia fasicularis	Pocillopora verucosa	Montipora truncata	Porites lutea	NA	NA	NA	NA	NA	NA	NA	NA	NA	NA	NA	NA	NA	NA	4	5	1	1	20	Fragment	DNS	Chisel	DNS	DNS	DNS	20	DNS	DNS	BAGGED SW, WASHED ON BOARD, ETH_95 ON BOARD, TRANS, FROZ_20	NA	NA	NA	NA	Fragment	PRESERVED_ETH_95%	PRESERVED_ETH_95, FROZ_20, WP_SW (MAYBE NOT FOR DNA SAMPLE)	ETH_95	WP_SW	NA	NA
[truncated: 36 more columns]
